# Supplementary material for: Cold exposure protects against medial arterial calcification development via autophagy
Source: PubMed Central journal article supplement (PMC10351118; doi:10.1186/s12951-023-01985-1), 2023-07-17
Supplement: 12951_2023_1985_MOESM1_ESM.pdf [file 12951_2023_1985_MOESM1_ESM.pdf]

1 **Cold Exposure Protects Against Medial Arterial Calcification Development via**  
2 **Autophagy**

3 Fu-Xing-Zi Li<sup>1</sup>, Jun-Jie Liu<sup>2</sup>, Feng Xu<sup>1</sup>, Su-Kang Shan<sup>1</sup>, Ming-Hui Zheng<sup>1</sup>, Li-Min Lei<sup>1</sup>,  
4 Xiao Lin<sup>3</sup>, Bei Guo<sup>1</sup>, Chang-Chun Li<sup>1</sup>, Feng Wu<sup>4</sup>, Ke-Xin Tang<sup>1</sup>, Ye-Chi Cao<sup>1</sup>, Yun-  
5 Yun Wu<sup>1</sup>, Jia-Yue Duan<sup>1</sup>, Yan-Lin Wu<sup>1</sup>, Si-Yang He<sup>1</sup>, Xi Chen<sup>1</sup> and Ling-Qing Yuan<sup>1</sup>

6 <sup>1</sup>Department of Metabolism and Endocrinology, National Clinical Research Center for  
7 Metabolic Disease, Hunan Provincial Key Laboratory of Metabolic Bone Diseases, The  
8 Second Xiangya Hospital, Central South University, Changsha, China.

9 <sup>2</sup>Department of Periodontal Division, Hunan Xiangya Stomatological Hospital, Central  
10 South University, Changsha, China.

11 <sup>3</sup>Department of Radiology, The Second Xiangya Hospital, Central South University,  
12 Changsha, China.

13 <sup>4</sup>Department of Pathology, The Second Xiangya Hospital, Central South University,  
14 Changsha, China.

15  
16 **Abstract**

17 Medial arterial calcification (MAC), a systemic vascular disease different from  
18 atherosclerosis, is associated with an increased incidence of cardiovascular events.  
19 Several studies have demonstrated that ambient temperature is one of the most  
20 important factors affecting cardiovascular events. However, there has been limited  
21 research on the effect of different ambient temperatures on MAC. In the present study,  
22 we showed that cold temperature exposure (CT) in mice slowed down the formation of  
23 vitamin D (VD)-induced vascular calcification compared with room temperature  
24 exposure (RT). To investigate the mechanism involved, we isolated plasma-derived  
25 exosomes from mice subjected to CT or RT for 30 days (CT-Exo or RT-Exo,  
26 respectively). Compared with RT-Exo, CT-Exo remarkably alleviated the  
27 calcification/senescence formation of vascular smooth muscle cells (VSMCs) and  
28 promoted autophagy by activating the phosphorylation of AMP-activated protein  
29 kinase (p-AMPK) and inhibiting phosphorylation of mammalian target of rapamycin  
30 (p-mTOR). At the same time, CT-Exo promoted autophagy in  $\beta$ -glycerophosphate ( $\beta$ -  
31 GP)-induced VSMCs. The number of autophagosomes and the expression of  
32 autophagy-related proteins ATG5 and LC3B increased, while the expression of p62  
33 decreased. Based on a microRNA chip microarray assay and real-time polymerase  
34 chain reaction, miR-320a-3p was highly enriched in CT-Exo as well as thoracic aortic  
35 vessels in CT mice. miR-320a-3p downregulation in CT-Exo using AntagomiR-320a-  
36 3p inhibited autophagy and blunted its anti-calcification protective effect on VSMCs.  
37 Moreover, we identified that programmed cell death 4 (PDCD4) is a target of miR-  
38 320a-3p, and silencing PDCD4 increased autophagy and decreased calcification in  
39 VSMCs. Treatment with CT-Exo alleviated the formation of MAC in VD-treated mice,  
40 while these effects were partially reversed by GW4869. Furthermore, the anti-arterial  
41 calcification protective effects of CT-Exo were largely abolished by AntagomiR-320a-  
42 3p in VD-induced mice. In summary, we have highlighted that prolonged cold may be  
43 a good way to reduce the incidence of MAC. Specifically, miR-320a-3p from CT-Exo

44 could protect against the initiation and progression of MAC via the AMPK/mTOR  
45 autophagy pathway.

46

47 **Keywords:** Cold exposure, Arterial calcification, Plasma-derived exosomes,  
48 Autophagy, Senescence, miR-320a-3p, PDCD4.

49

## 50 **Graphic Abstract**

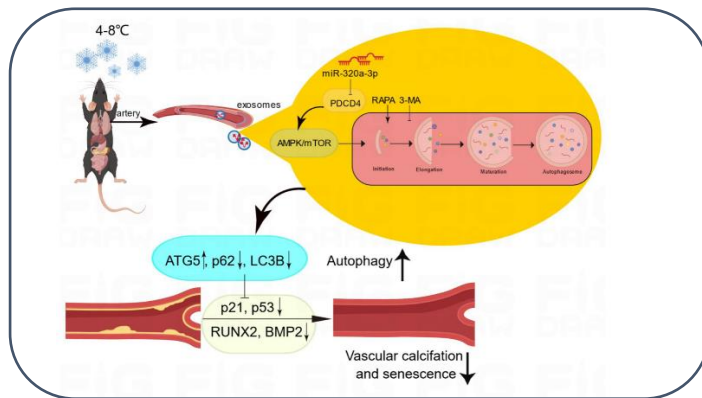

51

52

## 53 **Introduction**

54 The benefits of outdoor swimming in the winter and cold bathing are well known.  
55 Indeed, the physiological response of humans to cold environments has been studied  
56 for a long time. So-called cold exposure refers to the direct exposure of the human body  
57 to an environment lower than normal temperature (20°C). In a cold environment, the  
58 human body can produce a series of physiological reactions, but no definitive  
59 conclusion has been reached because this special environment has many influences on  
60 the human body, and the individual responses to the cold environment are also different.  
61 Researchers have shown that cold exposure can affect the activities of the nervous[1],  
62 cardiovascular[2, 3], musculoskeletal[4, 5], immune[6] and endocrine systems[7]. Cold  
63 environments induce long-term effects that increase the risk of cardiovascular disease  
64 (CVD) morbidity and mortality[8]. However, no studies have been reported on the  
65 effect of cold environments on the development of medial arterial calcification (MAC).

66 The founder of modern medicine, William Osler, once put forward the view of  
67 ‘vascular ageing, a man is as old as his arteries’, revealing the important connection  
68 between vascular ageing and individual ageing[9]. MAC is an important part of  
69 vascular ageing. It is a systemic vascular disease that is distinct from atherosclerosis  
70 and is commonly seen in diabetes, end stage renal disease and ageing, resulting in  
71 increased vascular stiffness[10, 11], diastolic heart failure[12], impaired coronary  
72 perfusion[13] and chronic limb ischaemia[14]. MAC was previously thought to be a  
73 simple passive deposition of calcium and phosphorus. However, researchers have paid  
74 more attention to the pathogenesis of arterial calcification since the discovery of bone  
75 morphogenetic protein (BMP) in tissue with MAC[15-19]. Nonetheless, the  
76 pathogenesis of MAC has not been fully elucidated – except for the pathogenesis of  
77 arterial calcification caused by a single gene mutation, which has been clearly studied  
78 – and there is a lack of treatment for the disease.

79 According to MISEV 2018, extracellular vesicles (EVs) can be divided into two  
80 subgroups: small EVs (sEVs or exosomes, < 100 nm or < 200 nm) and medium/large  
81 EVs (m/IEVs, > 200 nm)[20]. Exosomes are membranous vesicles secreted by cells,  
82 usually 50–150 nm in diameter, which are widely present in various body fluids and  
83 carry lipids, proteins, messenger RNAs (mRNAs), microRNAs (miRNAs), non-coding  
84 RNAs (ncRNAs) and other important biological function molecules[21-25].  
85 Calcification of the major arteries is an important phenotype of vascular ageing.  
86 Researchers have found that exosomes play different roles in MAC[26-29]. Thus, we  
87 hypothesis exosomes may serve as communication vesicles and mediate vascular  
88 calcification at an ambient temperature.

89 Autophagy is associated with many physiological and pathological processes, such  
90 as development, differentiation, neurodegenerative diseases[30, 31], stress[32],  
91 infection[33] and cancer[34]. Mammalian target of rapamycin (RAPA) (mTOR) is an  
92 important kinase that regulates the induction of autophagy. Activated mTOR acts via  
93 AKT and mitogen-activated protein kinase (MAPK) signalling to inhibit autophagy,  
94 while adenosine monophosphate-activated kinase (AMPK) and p53 signalling  
95 negatively regulate mTOR to promote autophagy. Studies have shown that autophagy  
96 is particularly closely related to ageing[35]. Cell ageing and autophagy have a common  
97 regulatory pathway that involves key proteins such as mTOR, SIRT1 and p53. With  
98 ageing, cellular senescence is usually accompanied by a decrease in the level of  
99 autophagy as well as the degradation of damaged organelles and proteins; the decrease  
100 in the level of autophagy can accelerate the ageing process[13, 36]. Multiple studies  
101 have shown that autophagy occurs in the context of atherosclerosis[37-39] and  
102 hypertension[40]. Evidence suggests that RAPA, an inducer of autophagy, prevents  
103 phenotypic switching and the hyperproliferation of vascular smooth muscle cells  
104 (VSMCs)[41]. Therefore, autophagy may act as an endogenous protective mechanism  
105 to alleviate calcification in VSMCs[42]. These phenomena suggest that autophagy  
106 plays a key role in arterial calcification.

107 In the present study, we hypothesised that plasma-derived exosomes isolated from  
108 mice subjected to cold temperature exposure (CT-Exo) protect against the calcification  
109 and senescence of the aortic media by regulating the level of autophagy. We thoroughly  
110 explored the effects of CT on the pathogenesis of MAC and clarified its mechanism,  
111 investigating whether cold temperature exposure (CT) can protect against MAC,  
112 whether autophagy is involved in arterial calcification during CT and whether plasma-  
113 derived exosomes play a protective role by regulating autophagy. Our findings might  
114 provide new ideas and new ways to explore the pathogenesis and prevention of MAC.

## 115 116 **Methods and materials**

### 117 118 **Cell Culture**

119 VSMCs were purchased from the National Platform of Experimental Cell Resources  
120 for SciTech (Beijing, China). They were incubated in Dulbecco's Modified Eagle's  
121 Medium (DMEM) (Gibco, Grand Island, NY, USA) with 10% foetal bovine serum  
122 (FBS; Gibco) and 1% penicillin-streptomycin (P1400, Solarbio, Beijing, China). The

123 culture medium was refreshed every 3 days and the cells were cultured at 37°C with a  
124 humidified atmosphere of 5% CO<sub>2</sub>. To induce calcification, VSMCs were cultured in a  
125 medium containing 10 mM β-glycerophosphate (β-GP; 50020, Sigma-Aldrich, St.  
126 Louis, MO, USA) to induce the osteoblastic differentiation of VSMCs. To reveal the  
127 effect of exosomes isolated from mice subjected to room temperature exposure (RT-  
128 Exo) or CT-Exo on the osteoblastic differentiation of VSMCs and the mechanism  
129 involved, VSMCs were incubated with 200 ng/μL of CT-Exo or RT-Exo in subsequent  
130 experiments. To investigate the effect of autophagy on VSMC calcification, cells were  
131 pre-treated with 5 mM of the autophagy inhibitor 3-MA (5142-23-4; SelleckChem,  
132 USA) or 1 μM of the autophagy inducer RAPA (53123-88-9; SelleckChem) for 30 min.  
133 The cells were treated with β-GP for various times and then collected for different  
134 experiments: after 3 days, cells were collected for western blotting; after 10 days, cells  
135 were collected for senescence-associated β-galactosidase (SA-β-gal) staining (C0602;  
136 Beyotime Institute of Biotechnology, Shanghai, China); after 14 days, cells were  
137 collected for alkaline phosphatase (ALP) activity detection (A059-1-1; Nanjing  
138 Jiancheng Bioengineering Institute, Nanjing, China) and ALP staining (Solarbio); and  
139 after 28 days, cells were collected for ARS staining (G1038; Servicebio, Wuhan,  
140 China). Agonists and inhibitors of the AMPK/mTOR signalling pathway were used to  
141 investigate its role in calcification. VSMCs were stimulated with 10 μM of Compound  
142 C (S7306; SelleckChem) or 10 μM of MHY1485 (S7811; SelleckChem) for 30 min and  
143 then treated with 200 ng/μL of CT-Exo for 48 h. p-AMPK, t-AMPK, p-mTOR, t-mTOR  
144 and RUNX2 protein expression was evaluated in the cell lysates. The SA-β-gal and  
145 ARS staining was the same as described above; CT-Exo, Compound C and MHY1485  
146 were changed once every 3 days for a period of 10 or 28 days, respectively.

147

#### 148 **Plasma Collection and Administration**

149 CT plasma or CT-Exo<sup>free</sup> plasma was isolated from mice subjected to CT for 30 days  
150 (4–8°C). CT-Exo<sup>free</sup> plasma was produced as follows: CT plasma was diluted with PBS  
151 (1:4, v/v), and then ultracentrifuged at 100,000 g for 18 h to collect the supernatant.  
152 After centrifugation, the exosomes were concentrated at the bottom of the test tube and  
153 about 80% of the upper plasma had been collected, CT-Exo<sup>free</sup> plasma was filtered by  
154 0.22 μm filter and centrifuged at 4,000 g to approximately the initial plasma volume by  
155 ultrafiltration in a 15 mL Amicon Ultra-15 centrifugal filter unit (Millipore, Billerica,  
156 MA, USA). The exosomes were stored at -80°C before use.

157 Six-week-old male mice (n = 6) were systemically treated with phosphate-buffered  
158 saline (PBS), CT plasma or CT-Exo<sup>free</sup> plasma (100 μL/injection) via tail intravenous  
159 injection 8 times over 24 days (From 0 day to 24<sup>th</sup> day)[43]. On the 14<sup>th</sup> day, the mice  
160 were intraperitoneally injected with vitamin D (VD) for 5 consecutive days and mice  
161 were sacrificed after waiting for another week of PBS, CT plasma or CT-Exo<sup>free</sup> plasma  
162 treatment.

#### 163 **Isolation and Identification of Exosomes**

164 Plasma samples were obtained from RT mice (kept at 22–25°C) or CT mice (kept at 4–  
165 8°C) for 30 days. Briefly, we collected the whole blood of mice using cardiac blood  
166 collection technology into Eppendorf (EP) tubes containing Ethylene Diamine Tetra

167 Acetic Acid (EDTA) anticoagulant. Blood samples were processed within 30 min of  
168 collection. The mixture was centrifuged to collect the plasma at 3,000 g for 20 min.  
169 Subsequently, the plasma underwent successive centrifugation at 3,000 g for 20 min  
170 and then 10,000 g for 30 min to discard dead cells and cellular debris. Then supernatant  
171 was collected, supernatant:PBS=1:4 Plasma+PBS suspension was added to the ultra-  
172 high centrifuge tube. The final supernatant was ultracentrifuged at 100,000 g for 120  
173 min. The supernatant was removed, with 500  $\mu$ L left at the bottom and then 11 mL PBS  
174 was added to resuspend, before being ultracentrifuged again at 100,000 g for 120 min  
175 (avoiding freeze-thaw cycles) and then re-suspended in 15 mL of PBS. The suspension  
176 was filtered through a 0.22  $\mu$ m filter steriliser (Millipore) and centrifuged at 4,000 g to  
177 approximately 200  $\mu$ L by ultrafiltration in a 15 mL Amicon Ultra-15 centrifugal filter  
178 unit (Millipore). All procedures were performed at 4°C. Exosomes were stored at -80°C  
179 or used for the downstream experiments.

180 The exosomal protein content was quantified with the BCA protein assay kit (P0012;  
181 Beyotime). Transmission electron microscopy (TEM; H-7650, Hitachi, Tokyo, Japan)  
182 and dynamic light scattering (DLS) with a Nanosizer™ instrument (Malvern  
183 Instruments, Malvern, UK) were used to observe the morphology and measure the size  
184 distribution of exosomes, respectively. The protein expression of exosomal markers  
185 (TSG101, CD81 and CD9) was assessed by western blotting.

186 For *in vitro* assays, exosomes in different groups were used at a concentration of 200  
187 ng/ $\mu$ L. For *in vivo* experiments, exosomes were used at 200  $\mu$ g (dissolved in 100  $\mu$ L  
188 PBS for intravenous injection) per time and per mouse.

189

## 190 TEM

191 VSMCs were fixed overnight in 2.5% glutaraldehyde and post-fixed in 1% osmic acid  
192 for 2 h. The samples were then dehydrated, embedded and sectioned. After being double  
193 stained with 3% uranyl acetate and lead nitrate, the autophagic structures in the cells  
194 were viewed using a TEM (H-7650, Hitachi, Tokyo, Japan).

195

## 196 Exosome Uptake Assay and Tracing

197 *In vitro*, CT-Exo were labelled with PKH26 red fluorescent dye (MINI26-1KT, Sigma-  
198 Aldrich) according to the manufacturer's protocol. After removing the unbound dye,  
199 CT-Exo were added to the VSMCs and incubated at 37°C for 6 h. After discarding the  
200 culture supernatant and washing the cells with PBS, the cells were fixed with 4%  
201 paraformaldehyde (PFA) for 15 min and then incubated with DAPI (C0065; Solarbio)  
202 to stain the nuclei. The uptake of the red PKH26-labeled CT-Exo by VSMCs was  
203 determined with a fluorescence microscope (Nikon Instruments Korea, Seoul, Korea).

204 *In vivo*, to explore whether CT-Exo could be transported from bone to blood vessel  
205 walls after intramedullary injection, 100  $\mu$ L of 1  $\mu$ g/ $\mu$ L CT-Exo was labelled with 5  $\mu$ L  
206 of 200  $\mu$ g/mL 1,1'-diocadecyl-3,3,3',3'-tetramethylindotricarbocyanine iodide (DiR;  
207 2024243, Invitrogen, Carlsbad, CA, USA) according to the manufacturer's instructions.  
208 Then, the same was ultracentrifuged to remove unbound dye. Mice were injected with  
209 DiR-labelled CT-Exo via the tail vein injection for 3 consecutive days. Live imaging  
210 was performed 24 h after the last injection. The mice were killed, organs removed for

211 imaging, the thoracic aorta of the mice was dissected and immunofluorescence staining  
212 was performed on quick frozen sections to analyse the uptake of exosomes in arterial  
213 vessels. An anti-TSG101 antibody (1:250, bs-1365R, Bioss, Beijing, China) was used  
214 to label exosomes.

215

### 216 **Measurement of Reactive Oxygen Species (ROS) Generation**

217 Intracellular ROS production was measured by flow cytometry using the cell-  
218 permeable fluorogenic probe DCFH-DA (S0033S; Beyotime) according to the  
219 manufacturer's instructions. Briefly, calcified VSMCs were treated with 200 ng/ $\mu$ L of  
220 CT-Exo or PBS for 6 days, washed three times with PBS and then incubated with  $1 \times$   
221  $10^{-5}$   $\mu$ M DCFH-DA at 37°C for 20 min.

222

### 223 **Apoptosis Assay**

224 VSMCs were treated with CT-Exo or PBS with or without  $\beta$ -GP for 3 days. Apoptosis  
225 was measured using the Annexin V-FITC/PI Detection Kit (556547, BD Bioscience,  
226 USA) according to the manufacturer's protocol. For Annexin V-FITC/PI staining, the  
227 treated cells were harvested, washed twice with PBS and resuspended in 300  $\mu$ L of  $1 \times$   
228 binding buffer, at room temperature in the dark, followed by incubation with 5  $\mu$ L of  
229 Annexin V-FITC for 15 min and 10  $\mu$ L of PI solution for 5 min. Next, the cell  
230 suspension was diluted with 200  $\mu$ L of annexin V binding buffer and analysed by flow  
231 cytometry.

232

### 233 **Animal Study**

234 Mice were housed in the Animal House of the Second Xiangya Hospital with a 12-h  
235 photoperiod. All experiments were started on 7–8 week old mice. Mice were placed in  
236 RT (22–25°C) or CT (4–8°C) environments, and their hair changes, mental state and  
237 activity were observed. Their body mass was measured and recorded at regular intervals  
238 every week. On the 30<sup>th</sup> day after modelling, blood was taken to measure ALT levels.  
239 Mice were shaved to observe whether their skin was frostbitten, important organs were  
240 collected for photography and the mass of the heart, liver, spleen, lung, and kidney  
241 tissues was measured. The organ indices and lung wet/dry weight of the mice were  
242 calculated.

243 Mice were injected intraperitoneally with VD (500 U/g/day) for 5 days to induce  
244 arterial calcification and ageing. Mice were fed with regular chow throughout the entire  
245 experiments. The RT mice were kept at 22–25°C for 30 days. The CT mice were first  
246 kept at 18°C for 7 days (for adaptation) and then kept at 4–8°C for another 30 days. The  
247 4–8°C cold room was equipped with a ventilation system that allowed cold air to  
248 circulate.

249 After 30 days of RT or CT, the mice were administered a high-dose of VD for 5  
250 consecutive days, followed by waiting for 7 days. This treatment occurred at either RT  
251 or CT, depending on the initial 30-day treatment. All live mice (n = 6) were sacrificed  
252 via the intraperitoneal injection of sodium pentobarbital (50 mg/kg) followed by  
253 cervical dislocation. Blood samples were collected to detect the levels of  
254 aminotransferase (ALT), using an automatic biochemical analyser (Chemray 800; Redu

255 Life Technology, Shenzhen, China). The thoracic aorta was embedded in paraffin,  
256 sectioned and then stained with ARS. The artery from the aortic arch to the iliac branch  
257 was isolated for the determination of arterial wall calcium content. No mice died during  
258 the experiment.

259 In another experiment, CT mice were injected intraperitoneally with GW4869 (2  
260 mg/kg; S7609, SelleckChem) to inhibit circulating exosomes[44, 45].  
261 Immunohistochemistry was carried out to determine RUNX2 expression in aortic  
262 tissues. ARS staining were used to detect MAC. Finally, the calcium content was  
263 measured. The impact of CT-Exo and RT-Exo on acute arterial calcification and the role  
264 of miR-320a-3p in the CT-Exo-induced alleviation of arterial calcification were also  
265 evaluated. Mice were injected intravenously with 200 µg of CT-Exo, AntagomiR-320a-  
266 3p or AntagomiR-NC-pre-treated CT-Exo, or an equal volume of PBS (100 µL per  
267 mouse) every 3 days until the end of the experiment (n = 6 per group). At the same time,  
268 the mice were injected with VD for 5 consecutive days, followed by waiting for 7 days.  
269 Blood samples were collected to detect the levels of blood urea nitrogen (BUN),  
270 creatinine (CREA), calcium, and phosphorus using an automatic biochemical analyser.  
271 The thoracic aortas were dissected. Immunohistochemistry was carried out to determine  
272 the levels of RUNX2 in aortic tissues. ARS or Von Kossa staining (G1043; Servicebio)  
273 was used to detect artery calcification. Finally, the calcium content was measured.

274 To explore whether miR-320a-3p was the only effective component in CT-Exo, we  
275 intravenously injected 200µg CT-Exo, 5mg/kg AgomiR-320a-3p, 5mg/kg AgomiR NC,  
276 or equivalent volume of PBS (100 per mouse) into mice every 3 days until the end of  
277 the experiment (n = 6 per group). Meanwhile, mice were continuously injected with  
278 VD for 5 days and then waited for 7 days. The thoracic aorta was dissected, ARS  
279 staining was performed to detect the content of mineralised nodules in the arteries and  
280 calcium content was measured. Immunohistochemical detection of RUNX2 levels was  
281 performed on the aortic mesomembrane.

282 Next, whether CT-Exo exerts an inhibitory effect on MAC *in vivo* through the  
283 autophagy pathway was investigated. The mice were randomly divided into six groups  
284 (n = 6 per group): PBS (CTRL), VD+PBS (PS), VD+CT-Exo (CT-Exo), VD+3-MA (3-  
285 MA), VD+RAPA (RAPA) and VD+CT-Exo+3-MA (CT-Exo+3-MA). Mice were  
286 intraperitoneally injected with either 3-MA (15 mg/kg) or RAPA (2mg/kg) starting 5  
287 days before the first CT-Exo injection (CT-Exo was injected every 3 days for a total of  
288 eight injections) until the experiment was terminated. Then, arterial calcification was  
289 induced by VD 2 weeks before the mice were sacrificed. One mouse from the CT-  
290 Exo+3-MA group and the RAPA group died from unknown causes after being treated  
291 four times. Immunohistochemistry was carried out to determine p21 expression in  
292 aortic tissues. MAC was detected by ARS and Von Kossa staining and the calcium  
293 content was measured.

294

### 295 **Quantitative Real-Time Polymerase Chain Reaction (qRT-PCR)**

296 Total RNA was isolated from cells with TRIzol Reagent (Invitrogen) based on the  
297 manufacturer's instructions[46]. For miRNA detection, miRNA was reverse transcribed  
298 and analysed by TB Green® Premix Ex Taq™ II (Tli RNaseH Plus; RR820A, Takara,

299 Kyoto, Japan) based on the manufacturer's protocol and using U6 as the normalisation  
300 control. U6 (HmiRQP9001) and miR-320a-3p (HmiRQP0405) primers were purchased  
301 from GeneCopoeia (Guangzhou, China).

302

### 303 **RNA Sequencing**

304 The RT-Exo and CT-Exo groups were selected for RNA sequencing (n = 3 per group).  
305 Total RNA was extracted and quantified using a NanoDrop spectrophotometer and an  
306 Agilent 2100 bioanalyzer (Agilent, Santa Clara, CA, USA). A messenger RNA (mRNA)  
307 library was then constructed and amplified with Phi29 to produce 100 base pair reads  
308 on the BGISEQ500 platform (BGI, Shenzhen, China). SOAPnuke (V1.5.2) was used to  
309 filter the sequencing data and Bowtie2 (V2.2.5) was used to compare the clean reads  
310 with the gene database established by Shenzhen Beijing Genomics Institute to calculate  
311 gene expression levels and identify differentially expressed genes (DEGs) (fold-change >  
312 1.5, q < 0.05). The annotated DEGs were analysed using Phyper based on Gene  
313 Ontology (GO) and Kyoto Encyclopaedia of Genes and Genomes (KEGG) analysis.  
314 Gene set enrichment analysis (GSEA) was used to evaluate DEGs enriched for either  
315 negatively or positively correlated genes.

316

### 317 **RNA Interference**

318 Small interfering RNAs (siRNAs) and the negative control RNA duplex (siRNA-NC)  
319 were purchased from GenePharma Biotech (Shanghai, China). The miR-320a-3p  
320 mimics or miR-320a-3p inhibitor and scrambled oligonucleotides (mimics NC or  
321 inhibitor-NC) were purchased from GenePharma Biotech. These were transfected into  
322 cells during the logarithmic growth phase. The transfection was performed using the  
323 GP-transfect-Mate transfection reagent (GenePharma Biotech) according to the  
324 manufacturer's protocol. The transfected sequences of the miR-320a-3p  
325 mimics/inhibitor and siRNA oligonucleotides are shown in Additional file 1, Table S1.  
326 AgomiRs or AntagomiRs were purchased from GenePharma Biotech. CT-Exo were  
327 transfected with AntagomiR-320a-3p or AntagomiR-NC at 200 nM for 60 min at 37°C.  
328 The AgomiRs and AntagomiRs that were not transfected were removed by  
329 centrifugation at 4,000 g for 5 min using a 100 kDa Amicon Ultra-4 Centrifugal Filter  
330 Unit (Millipore)[26]. The internalisation of AntagomiR-NC-Cy3 by CT-Exo was  
331 assessed by qRT-PCR. Treatment with CT-Exo and other AntagomiRs was used for  
332 subsequent experiments.

333

### 334 **Western Blotting**

335 Total protein was extracted from cultured VSMCs, artery samples or exosomes with  
336 radioimmunoprecipitation assay (RIPA) buffer (P0013B; Beyotime). The protein  
337 concentration was measured by the BCA assay. Total protein (20–40 µg) was submitted  
338 to 8–12% sodium dodecyl sulphate-polyacrylamide gel electrophoresis (SDS-PAGE)  
339 for separation. The separated protein was transferred onto 0.2 or 0.45 µm  
340 polyvinylidene difluoride (PVDF) membranes (Millipore). The membranes were  
341 incubated in 5% non-fat milk or bovine serum albumin (BSA) (depending on the  
342 primary antibody), followed by incubation overnight with primary antibody. The



343 following primary antibodies were used: anti-CD9 (ab92726, Abcam, 1:2000), anti-  
344 CD81 (ab109201, Abcam, 1:1000), anti-TSG101 (bs-1365R, Bioss, 1:500), anti-  
345 RUNX2 (ab76956, Abcam, 1:1000), anti-BMP2 (bs-10696R, Bioss, 1:500), anti-p53  
346 (10442-1-AP, Proteintech, 1:3000), anti-p62 (18420-1-AP, Proteintech, 1:2000), anti-  
347 ATG5 (66744-1-Ig, Proteintech, 1:4000), anti-LC3B (14600-1-AP, Proteintech, 1:4000,  
348 to determine the LC3B-II:LC3B-I ratio), anti-PDCD4 (12587-1-AP, Proteintech,  
349 1:1000), anti-p-AMPK (sc33524, Santa Cruz, 1:500), anti-t-AMPK (sc25792, Santa  
350 Cruz, 1:500), anti-p-mTOR (2971, CST, 1:1000), anti-t-mTOR (2983, CST, 1:1000),  
351 anti- $\beta$ -actin (20536-1-AP, Proteintech, 1:3000) and anti-GAPDH (10494-1-AP,  
352 Proteintech, 1:5000). After washing the blots, they were incubated in secondary  
353 antibody conjugated to horseradish peroxidase (SA00001-1 or SA00001-2, Proteintech,  
354 1:5000) for 1 h at room temperature. The immunoreactive bands were visualised with  
355 chemiluminescent assay using a chemiluminescence kit (RPN2232, Amersham  
356 Biosciences Ltd., UK) and then analysed with an Amersham Imager 600 (General  
357 Electric, USA) and Image-Pro Plus software (version 6.0). The relative protein  
358 expression level was normalised to the intensity of the  $\beta$ -actin or GAPDH band.

359

### 360 **Luciferase Reporter Assay**

361 For the luciferase reporter assay, VSMCs were co-transfected with a luciferase reporter  
362 carrying the wild-type PDCD4 3'-untranslated region (UTR), a mutant PDCD4 3'-UTR  
363 and miR-320a-3p mimics or scramble oligonucleotides. Forty-eight hours after  
364 transfection, luciferase activity was quantified with the luciferase assay system  
365 (Promega, Madison, WI, USA). The nucleotide sequences of primers for the  
366 construction and mutation of 3' UTR PDCD4 mRNA were purchased from Ribobio  
367 (Guangzhou, China).

368

### 369 **Immunohistochemistry**

370 As mentioned above, the expression of RUNX2 and p21 in aortic tissue was examined  
371 by immunohistochemistry[45]. In brief, arterial tissue sections were incubated at 65°C  
372 for 2 h, dewaxed in turpentine twice for 10 min each; and rehydrated in 99%, 85% and  
373 75% ethanol for 5 min each. Antigen retrieval was performed in a trypsin-EDTA  
374 solution. Next, sections were blocked with 5% BSA for 30 min at room temperature  
375 and incubated with specific primary antibodies, including anti-RUNX2 (bs-1134R,  
376 Bioss, 1:300) and anti-21 (10355-1-AP, Proteintech, 1:400) at 4°C overnight. The  
377 following day, sections were incubated with the appropriate secondary antibody  
378 conjugated to horseradish peroxidase (PV-9000, ZSGB-BIO, Beijing, China) at room  
379 temperature for 30 min. For control experiments, the primary antibody was replaced by  
380 PBS. Finally, the sections were incubated with DAB chromogenic solution (DA1015;  
381 Solarbio) for 1 min at room temperature. Nuclei were counterstained with haematoxylin  
382 (Solarbio) for 1 min at room temperature. The stained tissue was observed under a  
383 CX31 light microscope (Olympus Corporation, Japan). Images were taken at 100×  
384 magnification and images analysed using Image-Pro Plus software (version 6.0).

385

### 386 **Analysis of Vascular Calcium Content**

387 Arterial samples were decalcified with 0.6 N HCl at 4°C for 48 h. After determining  
388 the protein concentration, the calcium content in the supernatant was assessed using a  
389 commercial kit (C004-2-1; Nanjing Jiancheng Bioengineering Institute). The vascular  
390 calcium content was normalised to the protein concentration.

391

### 392 **Statistical Analysis**

393 All data are presented as the mean  $\pm$  standard deviation of three independent  
394 experiments. Data were analysed and plotted using GraphPad Prism software (San  
395 Diego, CA, USA) and ImageJ software (National Institutes of Health, Bethesda, MD,  
396 USA). The unpaired, two-tailed Student's *t*-test was conducted to compare two groups.  
397 One- or two-way analysis of variance (ANOVA) with the Bonferroni *post hoc* test was  
398 used to compare three or more groups. Results were considered significant when the *p*-  
399 value was  $< 0.05$ . In the Figures, statistical significance is indicated as ns  $> 0.05$ ; \**p*  $<$   
400  $0.05$ ; \*\**p*  $< 0.01$ ; \*\*\**p*  $< 0.001$  and \*\*\*\**p*  $< 0.0001$ .

401

### 402 **Results**

#### 403 **CT-Exo Played a Certain Role in the Progression of Protected against VD-Induced** 404 **MAC in CT Mice**

405 Firstly, we tested the food intake and body weight of mice in the low-temperature model,  
406 and the results showed that compared with the RT group, the average food intake of  
407 mice in the CT group was significantly increased, indicating that low-temperature can  
408 increase the food intake level of mice. The measurement of the weight of mice indicated  
409 that the weight of CT group mice showed a decreasing trend within 6 days, and  
410 gradually recovered and increased after 6 days. We observed that over time, the overall  
411 body weight was attenuated despite the stable food intake in CT mice (Additional file 1:  
412 Fig. s1, a and b). The level of ALT showed no significant difference between these two  
413 groups (Additional file 1: Fig. s1c). After shaving the hair of the mice (Additional file 1:  
414 Fig. s2a), we found that the mice showed no signs of numbness or frostbite, and there  
415 was no erythema, edema, hard gangrene, infarction, or epidermal detachment on the  
416 skin surface. After dissecting the mice, the liver, lungs, spleen, heart, and kidneys were  
417 taken. The general morphology is shown in Additional file 1: Fig. s2b. The organ index  
418 can objectively reflect the function of relevant organs and is one of the important  
419 biological indicators for experimental animals. As shown in Additional file 1: Fig. s2c,  
420 except for the increase in cardiac index in the CT group, there was no significant  
421 difference in liver, spleen, lung, kidney organ indices and liver morphology  
422 (Additional file 1: Fig. s2d) between two group mice, suggesting that all CT and RT  
423 mice are in a healthy metabolic status. H&E staining of lung tissues showed that  
424 exposure to cold stress slightly aggravated lung damage. In the lung slightly disruption  
425 of the alveolar structure, as well as vascular base thickening, a mild thickened alveolar  
426 wall and minimal inflammatory cell infiltration, were observed when compared to the  
427 RT group (Additional file 1: Fig. s2d). The CT mice had higher lung interstitial  
428 inflammation score and lung wet/dry ratio compared with the RT mice, but only by  
429 trend (Additional file 1: Fig. s2, e and f).

430 To investigate the protective effect of CT on MAC, we subjected mice to CT or RT  
431 for 30 days and then injected with VD to induce MAC. We kept mice in the CT or RT  
432 environment throughout the experiment (Fig. 1a). Based on ARS staining of the  
433 thoracic aorta, there was a lower degree of MAC in CT mice compared with RT mice  
434 (Fig. 1, b and c). The MAC in cold-exposed mice was significantly blunted, as  
435 evidenced by the decreased calcium content (Fig. 1d). The effect of a cold environment  
436 on the body's metabolism is holistic and systemic. We wondered whether these anti-  
437 arterial calcification protective effects of CT on MAC in mice could be transferred  
438 through circulating blood factors. We collected plasma from CT mice and then  
439 intravenously injected mice with MAC with CT-Exo or CT-Exo<sup>free</sup> plasma every 3 days  
440 for a total of eight times (Fig. 1e). Surprisingly, the CT-Exo group had the lowest ARS-  
441 positive area of all mice with MAC. Treatment with CT-Exo<sup>free</sup> plasma slightly  
442 ameliorated the degree of MAC, as shown by the ARS staining and calcium content.  
443 However, the effect of CT-Exo<sup>free</sup> plasma was much lower CT-Exo plasma, which might  
444 suggest that CT-Exo play an important role in preventing calcification formation (Fig.  
445 1, f to h). Subsequently, we explored the role of CT-Exo in CT mice with MAC. We  
446 intraperitoneally injected the mice with the exosome inhibitor GW4869, which blocks  
447 exosome production, every other day (Fig. 1i). The ARS staining area, RUNX2  
448 expression and arterial calcium and calcification were significantly lower in CT mice  
449 compared with CT+GW4869 mice (Fig. 1, j to n), suggesting that GW4869 reverse the  
450 protective effects of CT. These results indicate that inhibition of endogenous CT-Exo  
451 can promote MAC.

452

### 453 **CT-Exo Mediated the CT-Induced MAC Inhibitory Effects in Mice**

454 To directly identify the effects of exosomes, we subjected the mice to RT or CT for 30  
455 days, isolated exosomes from them (RT-Exo or CT-Exo) and purified them by hyper-  
456 centrifugation (Additional file 1: Fig. s3a). As viewed with TEM, CT-Exo and RT-Exo  
457 exhibited a cup-like morphology ((Additional file 1: Fig. s3b). Nanoparticle tracking  
458 analysis (NTA) revealed that CT-Exo and RT-Exo had mean diameters of  $110.7 \pm 39.6$   
459 and  $109.6 \pm 40.9$  nm, respectively (Additional file 1: Fig. s3c), which are similar to a  
460 previous report[47]. Western blotting showed that a vast majority of the isolated CT-  
461 Exo and RT-Exo expressed exosomal markers including TSG101, CD9 and CD81  
462 (Additional file 1: Fig. s3d), which further indicates that these vesicles are exosomes.  
463 To determine whether exosomes could be incorporated by aortic VSMCs *in vivo*, we  
464 injected DiR-labelled CT-Exo into mice via the tail vein and tracked their distribution.  
465 We adjusted the fluorescence intensity of control mice to exclude the interference of  
466 autofluorescence. We successfully injected the DiR-labelled CT-Exo into the mice  
467 through the tail vein (Fig. 2a). Mice photography mainly detected the fluorescence  
468 signal in the liver and spleen (Additional file 1: Fig. s4). Considering that the relatively  
469 stronger fluorescence signal of the liver and spleen masked the fluorescence signals of  
470 other organs, we removed the liver and spleen, then repeated the imaging. Photographs  
471 showed that the fluorescent signals of the DiR-labeled exosomes entered the aorta after  
472 injection *in vivo* (Fig. 2a). In addition, CT-Exo injection significantly increased the  
473 expression of the exosomal marker TSG101 in VSMCs in the aortic media (Additional

474 file 1: Fig. s5). Moreover, TSG101 colocalised with alpha smooth muscle actin ( $\alpha$ -  
475 SMA), which suggests that VSMCs could take up the exosomes. Hence, we  
476 successfully injected exogenous CT-Exo into mice and they were then taken up by  
477 VSMCs in the aorta.

478 To investigate whether CT-Exo protect VSMCs against arterial calcification *in vivo*,  
479 we analysed the calcification level by using an *in vivo* model of VD-induced MAC in  
480 mice (Fig. 2b). VD-induced mice developed significant MAC compared with the  
481 vehicle control (PBS). Intriguingly, the MAC level in CT-Exo-treated mice ranged from  
482 undetectable to just very low, as demonstrated with the ARS (Fig. 2, c and f) and Von  
483 Kossa staining (Fig. 2, d and h). At the same time, based on the staining results, RT-  
484 Exo treatment slightly weakened MAC compared with PBS treatment. Unfortunately,  
485 there was no significant inhibition of MAC in the RT-Exo group compared with the  
486 PBS group (Fig. 2, c to h). Moreover, the aortic calcium content (Fig. 2g) and RUNX2  
487 immunostaining (Fig. 2, e and i) were significantly decreased in CT-Exo-treated mice  
488 compared with the VD-treated and RT-Exo-treated mice. These results show that CT-  
489 Exo serve as a protective factor in VD-induced MAC in mice.

490

#### 491 **CT-Exo Prevented Osteogenic Differentiation and Senescence of VSMCs via** 492 **Autophagy**

493 To determine whether CT-Exo play a vital effect on the osteogenic differentiation and  
494 senescence of VSMCs, we examined whether these exosomes could be taken up by  
495 VSMCs. We labelled CT-Exo with PKH26 and incubated VSMCs with the labelled  
496 exosomes. Fluorescence microscopy analysis showed that the labelled exosomes were  
497 taken up by the VSMCs (Fig. 3a). It is widely believed that the process of MAC is  
498 similar to bone mineralisation. ALP, RUNX2 and mineralised matrix are recognized  
499 phenotypic markers of osteoblasts and are upregulated during osteoblast differentiation  
500 of VSMCs[16, 47]. Consistent with our previous results, CT-Exo treatment  
501 significantly protected VSMCs against  $\beta$ -GP-induced osteogenic conversion, as  
502 demonstrated by the remarkably reduced ARS (Fig. 3, b and c) and ALP (Fig. 3f)  
503 staining of  $\beta$ -GP-treated VSMCs, and markedly decreased ALP activity (Fig. 3g) and  
504 the expression of RUNX2 protein (Fig. 3, h and i). VSMCs senescence were also  
505 decreased, denoted by reduced p53 expression (Fig. 3, h and i) and fewer SA- $\beta$ -gal-  
506 positive VSMCs (Fig. 3, d and e). Thus, we verified that CT-Exo could protected  
507 VSMCs against osteogenic differentiation and senescence *in vitro*.

508 To investigate the mechanism of anti-calcification protective effect of CT-Exo, we  
509 first examined the effect of CT-Exo on autophagosome formation in VSMCs. CT-Exo  
510 increased LC3B protein expression and reduced p62 protein expression during the  
511 osteoblastic differentiation of VSMCs (Fig. 3, j and k). TEM of typical autophagic  
512 structures provided direct evidence to support the CT-Exo-mediated increase in  
513 autophagy: there were more autophagosomes in VSMCs treated with CT-Exo than in  
514 the negative and positive controls ( $\beta$ -GP treatment alone and PS, respectively) (Fig. 3l).  
515 Studies have shown that autophagy plays an important role in the function of VSMCs  
516 and the development of vascular diseases, suggesting that autophagy may be a potential  
517 target to prevent vascular calcification[48]. It has previously been reported that

518 activating the AMPK[49] and mTOR signalling pathway regulates autophagy directly  
519 and indirectly[50]. AMPK could initiate autophagy either by directly phosphorylating  
520 the serine/threonine kinase ULK1[51] or indirectly by deactivating mTORC1[52]. As  
521 shown in Additional file 1: Fig. s6a, exposure to  $\beta$ -GP triggered a significant elevation  
522 in ROS production in VSMCs, as revealed by the increase in the percentage of cells  
523 with green fluorescence compared with CT-Exo, suggesting that ROS-induced  
524 oxidative injury may be involved in CT-Exo-attenuated cell death. As evidenced by  
525 Annexin V-FITC/PI double staining with flow cytometry, CT-Exo treatment decreased  
526 the percentages of early apoptotic (Annexin V-FITC positive/PI negative) and late  
527 apoptotic/dead (Annexin V-FITC/PI double positive) VSMCs (Additional file 1: Fig.  
528 s6b), revealing the CT-Exo protected VSMCs from apoptosis. Taken together, these  
529 data suggest that CT-Exo prevented osteogenic differentiation and senescence of  
530 VSMCs via autophagy.

531

### 532 **The Autophagy Inhibitor 3-MA Significantly Weakened the Pro-Autophagy Effect** 533 **of CT-Exo**

534 We next addressed the potential role of autophagy in the osteoblastic differentiation of  
535 VSMCs. RAPA, a pharmacological inducer of autophagy, can activate autophagy, cell  
536 proliferation and other cellular activities by inhibiting mTOR activity. RAPA treatment  
537 suppressed calcification and senescence of VSMCs, as demonstrated by the reduced  
538 matrix mineralisation (Fig. 4, a and b), SA- $\beta$ -gal staining (Fig. 4, c and d) and ALP  
539 staining and activity (Additional file 1: Fig. s7, a and b) compared with the PS group.  
540 We used 3-MA, a pharmacological inhibitor of autophagy, to decrease autophagy  
541 during osteoblastic differentiation of VSMCs. 3-MA treatment augmented matrix  
542 mineralisation (Fig. 4a, b), SA- $\beta$ -gal staining (Fig. 4, c and d) and ALP staining and  
543 activity (Additional file 1: Fig. s7, a and b) in VSMCs compared with the PS group.  
544 CT-Exo robustly protected VSMCs against osteoblastic differentiation and senescence,  
545 similar to RAPA, and the protective effect of CT-Exo could be reversed by 3-MA (Fig.  
546 4, a to d and Additional file 1: Fig. s7, a and b).

547 In the mouse model of MAC (Fig. 4e), CT-Exo protected against VD-induced MAC.  
548 RAPA treatment suppressed MAC and senescence of the aortic media compared with  
549 the PS group, as demonstrated by the reduced Von Kossa staining (Fig. 4f), p21  
550 expression (Fig. 4h), ARS staining (Additional file 1: Fig. s7, c and d) and calcium  
551 content (Additional file 1: Fig. s7e). Arterial calcification increased significantly in the  
552 group treated with 3-MA plus CT-Exo compared with the CT-Exo-treated group,  
553 demonstrated by the increased ARS (Additional file 1: Fig. s7, c and d) and Von Kossa  
554 (Fig. 4, f and g) staining, the elevated calcium content (Additional file 1: Fig. s7e) and  
555 the upregulation of p21 expression (Fig. 4, h and i) compared with the CT-Exo-treated  
556 group. Collectively, these results indicate that CT-Exo protects VSMCs against the  
557 osteoblastic differentiation and arterial calcification by promoting autophagy. 3-MA  
558 reversed the protective effect of CT-Exo on the osteoblastic differentiation of VSMCs.  
559 Thus, both *in vitro* and *in vivo*, the protective effect of CT-Exo against calcification was  
560 attenuated by blocking CT-Exo-induced autophagy.

561 To understand the role of the AMPK/mTOR signalling pathway in the induction of

562 autophagy by CT-Exo, we pre-treated VSMCs with CT-Exo for 30 min before  $\beta$ -GP  
563 treatment. Western blotting showed that compared with treatment with CT-Exo alone,  
564 treatment with 3-MA significantly attenuated CT-Exo-induced autophagy, reflected by  
565 the dramatic decrease in p/t-AMPK expression (Additional file 1: Fig. s7, f and g),  
566 whereas p/t-mTOR expression increased significantly (Additional file 1: Fig. s7, f and  
567 g). Interestingly, VSMCs were treated with or without CT-Exo or Compound C, an  
568 inhibitor of AMPK, or MHY1485, an activator of mTOR. In the presence of Compound  
569 C, the CT-Exo-induced inhibition of RUNX2 protein expression (Additional file 1: Fig.  
570 s8, a and b), ARS staining (Additional file 1: Fig. s8, c and e) and SA- $\beta$ -gal staining  
571 (Additional file 1: Fig. s8, d and f) were abolished. Similarly, MHY1485 mimicked the  
572 effects of Compound C. Thus, these experiments demonstrate that CT-Exo inhibited  
573 osteoblastic differentiation/ageing of VSMCs via the AMPK/mTOR signalling pathway.

574

### 575 **miR-320a-3p was Enriched in CT-Exo and Responsible for the CT-Exo-Induced** 576 **protection VSMCs against Calcification/Ageing**

577 To explore the mechanism involved in the CT-Exo-induced protection against MAC,  
578 we employed an Agilent miRNA array to compare the miRNA expression profiles of  
579 CT-Exo and RT-Exo from mouse plasma. We identified a total of 1380 miRNAs, of  
580 which 71 were differentially expressed (absolute fold-change  $\geq 1.5$ ,  $p < 0.05$ ) between  
581 CT-Exo and RT-Exo. We found that 33 miRNAs were much higher and 38 miRNAs  
582 were much lower in CT-Exo compared with RT-Exo (Fig. 5a). We selected miR-320a-  
583 3p, which was the most abundant miRNA in CT-Exo compared with RT-Exo (Fig. 5b).  
584 With qRT-PCR, we assessed the changes in miR-320a-3p expression in exosomes from  
585 plasma obtained from CT and RT mice. As shown in Fig. 5b, miR-320a-3p expression  
586 was higher in CT-Exo. Moreover, miR-320a-3p expression was significantly increased  
587 in vessels from CT mice compared with vessels from RT mice (Fig. 5c). After  
588 transfection with miR-320a-3p mimics, miR-320a-3p expression in VSMCs was  
589 significantly higher than in VSMCs transfected with NC mimics, and miR-320a-3p  
590 expression in VSMCs treated with miR-320a-3p inhibitor was significantly lower than  
591 in VSMCs treated with the NC inhibitor (Fig. 5d). Moreover, miR-320a-3p  
592 overexpression with mimics greatly decreased ALP activity, while miR-320a-3p  
593 knockdown with an inhibitor greatly increased ALP activity (Fig. 5e).

594 Previous studies have shown that miR-320a has a certain correlation with the  
595 occurrence and development of atherosclerosis[53]. However, the role of miR-320a-3p  
596 in VSMCs calcification is largely unknown. To assess the effects of miR-320a-3p on  
597 the osteoblastic differentiation of VSMCs, we first determined the effects of miR-320a-  
598 3p overexpression or knockdown in  $\beta$ -GP-induced VSMCs. miR-320a-3p  
599 overexpression reduced the expression of RUNX2, BMP2 and p21 and increased the  
600 expression of LC3B and ATG5 (Fig. 5, f and g). In contrast, miR-320a-3p knockdown  
601 inhibited the level of autophagy and promoted VSMCs calcification. We then used  
602 specific AntagomiRs to silence miR-320a-3p in CT-Exo. After transfection with  
603 Antagomir-320a-3p, miR-320a-3p expression in CT-Exo decreased significantly (Fig.  
604 5h). ARS staining showed VSMCs treated with AntagomiR-320a-3p and CT-Exo  
605 induced a much higher extent of mineralised nodule formation than VSMCs treated

606 with AntagomiR-NC and CT-Exo (Fig. 5, i and j). Knocking down miR-320a-3p in CT-  
607 Exo significantly reduced the ability of CT-Exo to restrain ALP activity (Fig. 5l) and  
608 ALP staining (Fig. 5k). Similarly, VSMCs treated with AntagomiR-320a-3p and CT-  
609 Exo showed accelerated senescence of VSMCs compared with VSMCs treated with  
610 AntagomiR-NC and CT-Exo (Fig. 5, m and n).

611 We assessed the role of miR-320a-3p in the CT-Exo-induced protection VSMCs  
612 against MAC in mice subjected to VD treatment (Fig. 6a). ARS staining indicated that  
613 ARS-positive mineralised nodule area was markedly elevated in the CT-  
614 Exo+AntagomiR-320a-3p group compared with the CT-Exo+AntagomiR-NC group  
615 (Fig. 6, b and c). The vascular calcium content analysis confirmed that CT-Exo  
616 markedly increased the vascular calcium content after pre-treatment with AntagomiR-  
617 320a-3p (Fig. 6d). These findings indicate that miR-320a-3p acts as the mediator of the  
618 CT-Exo-induced protection VSMCs against calcification. The CT-Exo+AntagomiR-  
619 320a-3p mice had slightly higher serum levels of BUN and CREA compared with the  
620 CT-Exo mice. Subsequently, both calcium and phosphorus could also be detected in  
621 CT-Exo+AntagomiR-320a-3p and CT-Exo mice, but these indicators were not  
622 significantly different between the three groups (Fig. 6, e to h). Interestingly, from the  
623 expression results of ARS staining (Fig. 6, j and k), calcium content (Fig. 6l) and  
624 RUNX2 expression (Fig. 6, m and n), we found that tail vein injection of AgomiR-  
625 320a-3p can provide a certain protective effect on arterial media calcification (Fig. 6i),  
626 but its protective effect is not as good as that of the CT-Exo group, indicating that miR-  
627 320a-3p was the main miRNA in CT-Exo, but not the only active component of CT-  
628 Exo.

629

#### 630 **miR-320a-3p Protected VSMCs Against Calcification and Ageing by Targeting** 631 **Programmed Cell Death 4 (PDCD4)**

632 To understand the mechanism by which miR-320a-3p restrained VSMCs calcification,  
633 we used the online bioinformatics tool TargetScan (Version 7.2,  
634 [http://www.targetscan.org/vert\\_72/](http://www.targetscan.org/vert_72/)) and miRDB (<http://mirdb.org/mirdb/index.html>)  
635 and miRWalk (<https://http://mirwalk.umm.uni-heidelberg.de/>) to predict potential  
636 target genes of miR-320a-3p (Fig. 7a). Among them, PDCD4 is an important tumour  
637 suppressor that inhibits carcinogenesis, tumour progression and invasion by inhibiting  
638 translation[54]. Recent studies have found that PDCD4 negatively regulates autophagy  
639 by inhibiting the expression of ATG5 in tumour cells[55] and plays a certain role in  
640 autophagy in the treatment of atherosclerosis[56]. The sequence alignment results  
641 illustrated that miR-320a-3p has a complementary pairing relationship with the 3'-UTR  
642 region of PDCD4 (Fig. 7b), indicating that PDCD4 may be a target gene of miR-320a-  
643 3p. A luciferase reporter assay also demonstrated that miR-320a-3p overexpression  
644 reduced the activity of wild type PDCD4 promotor but not mutant PDCD4 promoter  
645 (Fig. 7c). In addition, western blotting showed that PDCD4 protein was downregulated  
646 by miR-320a-3p mimics and upregulated by miR-320a-3p inhibitor (Fig. 7, d and f).  
647 These data suggest that PDCD4 may be a target of miR-320a-3p in VSMCs.

648 To determine whether PDCD4 mediates the inhibitory effect of miR-320a-3p on  
649 VSMC calcification, we also used PDCD4-specific siRNA to block its expression.

650 Western blot detected that all three siPDCD4 sequences could suppress > 70% of  
651 PDCD4 protein expression; the third siRNA sequence was the most effective (Fig. 7, e  
652 and g). Hence, we used this siRNA in subsequent experiments. PDCD4 downregulation  
653 reduced the expression of RUNX2 and p53 (Fig. 7, h and i) and decreased ARS (Fig. 7,  
654 j and l) and SA- $\beta$ -gal (Fig. 7, k and m) staining, indicating that PDCD4 plays a crucial  
655 role in VSMC autophagy and calcification. Notably, miR-320a-3p inhibitor enhanced  
656 the ARS and SA- $\beta$ -gal stained areas, but these effects were abolished by the suppression  
657 of PDCD4 (Fig. 7, j to m). After silencing PDCD4 by siRNA and inducing calcification,  
658 we measured the expression levels of autophagy-related and phosphorylated proteins  
659 in VSMCs 3 days later. Silencing PDCD4 could promote the occurrence of autophagy  
660 in VSMCs through the AMPK/mTOR signalling pathway, which was reflected in the  
661 overexpression levels of LC3B and ATG5 proteins (Additional file 1: Fig. s9, a and b).  
662 Taken together, these results demonstrate that miR-320a-3p protected VSMCs against  
663 calcification by targeting PDCD4.

664

## 665 **Discussion**

666 In the present study, autophagy played a vital endogenous protective role during cold  
667 exposure under  $\beta$ -GP/VD induction to attenuate MAC. Furthermore, miR-320a-3p,  
668 enriched in CT-Exo, promoted autophagy and mediated the protection VSMCs against  
669 MAC. Meanwhile, PDCD4 is a target gene of miR-320a-3p that regulates autophagy to  
670 reduce MAC.

671 The importance of ambient temperature on mouse physiology is not limited to the  
672 context of metabolic disease. Previous studies have shown that ambient temperature  
673 has a profound effect on the physiological responses of mice to infection, tumours and  
674 ageing. For example, mice exposed to higher temperatures have better immunity to  
675 bacterial, viral and protozoal infections[57, 58]. Mice raised in thermoneutrality have  
676 much smaller tumours[59]. Hypothermia correlates with a longer lifespan[60]. Cold  
677 exposure has been reported to suppress obesity, insulin resistance, adipose dysfunction  
678 and dyslipidaemia by promoting adipocyte thermogenesis[7]. The effects of cold  
679 exposure on atherosclerosis are still under debate. Cold exposure prevents  
680 atherosclerosis by activating fat thermogenesis, suppressing vascular inflammation and  
681 improving dyslipidaemia[61, 62]. In contrast, thermoneutral conditions (30°C) increase  
682 vascular inflammation and atherosclerosis by inhibiting adipose thermogenesis[63].  
683 Dong et al.[2] found that cold exposure promoted atherosclerotic plaque growth and  
684 instability in mice reared at 4°C with cold exposure for 3 or 7 weeks. However, another  
685 study showed that long-term cold exposure to 16°C for 8 weeks protected against  
686 Western diet-induced atherosclerosis[64]. These contradictory findings may be due to  
687 the different cold exposure conditions. Chen et al.[65] showed an inverse J-shaped  
688 association between human cardiovascular mortality and ambient temperature,  
689 suggesting that moderate cold (ranging from -1.4–22.8°C) leads to the lowest risk of  
690 cardiovascular death, but both extreme cold (-6.4 to -1.4°C) and heat (29.0–31.6°C)  
691 increase cardiovascular death risk. Seki et al.[4] exposed mice to 4°C and found that  
692 cold-activated brown fat can 'freeze' cancer cells to death. Based on the available  
693 research on the effect of cold stimulation on metabolism (insulin resistance, obesity,



694 diabetes, etc.), we found that most researchers used the temperature of 4°C[66, 67].

695 Prior to our study, the effect of cold exposure on MAC had not yet been studied;  
696 hence, our exploration of hypothermia and MAC is both novel and very necessary.  
697 When designing *in vivo* experimental cold exposure studies in mice, it is important to  
698 consider the different metabolic, cardiovascular and heat-sensing responses evoked by  
699 different cold stimulation temperatures. Indeed, the lack of standardisation in defining  
700 the extent of cold exposure has posed serious challenges in the field. We chose 4–8°C  
701 for 30 days to represent relatively chronic stimulation of low temperature in mice.  
702 Vascular ageing is manifested by morphological abnormalities of cells and  
703 histologically manifested as the increased deposition of collagen fibres, increased and  
704 disordered elastic fibres, arteriosclerosis and calcification[68]. We found that  
705 MAC/senescence can be weakened in mice subjected to chronic cold stimulation,  
706 mainly through CT-Exo, as demonstrated by the significantly increased calcification  
707 area of Von Kossa and ARS staining and calcium content as well as the upregulated  
708 expression of calcification and ageing marker proteins (RUNX2 and p21). *In vitro*, CT-  
709 Exo decreased SA-β-gal staining, ALP activity, RUNX2 and p53 expression and  
710 mineralised nodule formation in β-GP-induced VSMCs.

711 Here, using *in vitro* and *in vivo* models of arterial calcification, we found that  
712 autophagy plays a vital endogenous protective role during the osteoblastic  
713 differentiation of VSMCs. CT-Exo directly potentiated autophagy, which attenuated the  
714 osteoblastic differentiation of VSMCs *in vitro* and arterial calcification *in vivo*.  
715 Moreover, CT-Exo increased the number of autophagosomes in β-GP-induced VSMCs,  
716 increased the expression of the autophagy-related protein LC3B and decreased the  
717 expression of p62. The inhibition of autophagy by 3-MA significantly attenuated the  
718 inhibitory effect of CT-Exo on the osteoblastic differentiation of VSMCs. In contrast,  
719 the promotion of autophagy by RAPA attenuated the osteogenic differentiation of  
720 VSMCs. CT-Exo also attenuated arterial calcification by promoting autophagy in mice,  
721 as demonstrated by the fact that RAPA but not 3-MA blocked the effect of CT-Exo.  
722 Thus, targeting the autophagic pathway may help to prevent or treat vascular  
723 calcification[42, 69], which provides a theoretical basis by which CT-Exo protect  
724 against vascular calcification.

725 Intracellular mTOR includes two complexes, mTORC1 and mTORC2. mTORC1  
726 regulates cellular protein synthesis and cell growth through phosphorylation and  
727 activation of downstream target proteins such as p70 ribosomal S6 kinase 1 (S6K1),  
728 while mTORC2-related signalling pathways and functions are relatively less studied.  
729 Therefore, the currently available research has mainly focused on mTORC1[70].  
730 mTOR involves multiple pathways and there are mainly two upstream signalling  
731 pathways: the PI3K/Akt/mTOR canonical pathway and the AMPK/TSC1-TSC2/mTOR  
732 non-canonical pathway. Regulation of cell growth, proliferation, metabolism and  
733 autophagy is achieved through these two pathways[71]. mTOR signalling also plays an  
734 important role in the process of cellular senescence. Numerous studies have shown that  
735 inhibiting the mTOR signalling pathway by means of dietary restriction, RAPA or gene  
736 knockout can significantly delay cellular senescence[72, 73]. Increased mTOR activity  
737 is associated with ageing and autophagy deficits with age. The mTOR-specific inhibitor

738 RAPA can delay replicative senescence, reduce senescence caused by DNA damage,  
739 and reduce mitochondrial dysfunction[74]. We had previously reported that the mTOR  
740 signalling pathway is involved in the process of arterial calcification caused by trans-  
741 differentiation of VSMCs into osteoblasts and inhibiting the mTOR signalling pathway  
742 can delay vascular calcification[75]. Consistent with these findings, CT-Exo activated  
743 AMPK and inhibited mTOR in VSMCs, while AMPK inhibitors or mTOR activators  
744 abolished the CT-Exo-induced protection effects VSMCs against osteoblastic  
745 differentiation/ageing. Taken together, these results demonstrate that CT-Exo protects  
746 against arterial calcification by activating AMPK/mTOR signalling.

747 In recent years, researchers have found that miRNAs also play an important role in  
748 the occurrence and development of vascular ageing and ageing-related diseases[76].  
749 Previous studies have found that miR-320a is involved in the negative regulation of  
750 osteoblastic differentiation[77] and miRNA profiling revealed that miR-320a is  
751 overexpressed in osteoporotic samples[78]. However, the role of miR-320a-3p in the  
752 senescence of VSMCs has not yet been reported. We discovered the role of plasma  
753 exosome-derived miR-320a-3p in MAC for the first time and successfully identified its  
754 relevant downstream target gene, namely PDCD4. In contrast, miR-320a-3p silencing  
755 in VSMCs almost completely reversed these anti-calcification effects. Furthermore, we  
756 confirmed that miR-320a-3p knockdown in the context of CT-Exo treatment eliminates  
757 the anti-MAC effect in mice. PDCD4 is a transcriptional and translational inhibitor and  
758 tumour suppressor. Recent studies have shown that PDCD4 may also be involved in  
759 some inflammatory diseases[79] and negatively regulate autophagy[56]. Jiang et al.[80]  
760 found that PDCD4 deficiency attenuated atherosclerosis (a chronic inflammation of the  
761 arterial wall) in hyperlipidaemic mice partly by upregulating the anti-inflammatory  
762 cytokine IL-10. Meanwhile, Wang et al.[56] showed that endogenous PDCD4 promotes  
763 the formation of macrophage foam cells and the development of atherosclerosis by  
764 inhibiting autophagy. PDCD4 downregulation by miR-21 protects cardiomyocytes  
765 from ischaemia/reperfusion or ROS-induced injury[81]. Our study shows that  
766 endogenous PDCD4 promotes medial calcification/senescence and thus represents a  
767 potential therapeutic target for patients with MAC.

768 If the content of this study is transformed into research, it is obvious that it is  
769 impractical to collect exosomes from individuals exposed to cold environments and  
770 transplant them to other patients. Moreover, nucleic acids themselves are acidic and  
771 highly unstable in the blood, making it difficult to penetrate cell membranes. How to  
772 deliver drugs into cells from outside the body is a challenge and how to target drugs to  
773 diseased tissues to avoid systemic toxicity is also a problem. For these reasons, we  
774 suggest overexpressing miRNA-320a-3p in human blood extracellular vesicles before  
775 transplantation to exert a protective effect against arterial media calcification.  
776 Exosomes, as a naturally domesticated endogenous nanocarrier, can maintain the  
777 biological activity of their contents *in vivo* and have the characteristics of low  
778 immunogenicity and high safety. In addition, exosomes can circulate to all  
779 compartments in the body, which has good application potential in non-liver targeted  
780 nucleic acid drug delivery. Engineering transformation can maximise the advantages of  
781 extracellular vesicles as nucleic acid drug carriers and may become the mainstream

782 choice for extracellular nucleic acid drug carriers in the future.

783 There are some limitations to this study. In addition to the changes in the composition  
784 of plasma-derived exosomes induced by cold, we hypothesised that perivascular  
785 adipose tissue and brown adipose tissue in mice also secrete factors or vesicles that play  
786 a role in the calcification of the media under cold exposure. This will be our next  
787 research direction. The chronic cold stimulation at 4–8°C leads to a state of low  
788 metabolism and the ageing and calcification of VSMCs also slows down. Next, we will  
789 continue to study the effects of extremely cold (-10–0°C) and warm (34°C)  
790 environments on MAC in mice and the effects of acute, chronic and intermittent cold  
791 exposure on MAC. We believe that these results will be helpful to guide future clinical  
792 work. Another limitation of our study is that we did not perform a ‘dose-response’  
793 experiment to assess the effects of CT-Exo and RT-Exo on the vascular phenotype and  
794 the pathology of vascular calcification in normal physiology. Currently, there is no  
795 evidence for the physiological concentrations of CT-Exo and RT-Exo in vascular tissue.  
796 Future studies should use accurate assays to determine the physiological concentrations  
797 of CT-Exo and RT-Exo and to investigate whether there is a dose-dependent response  
798 in CT-Exo- and RT-Exo-treated mice. Finally, it remains to be determined whether the  
799 beneficial effects of miR-320a-3p observed in cold-exposed mice can be translated to  
800 humans. Additional work should determine the frequency, minimum intensity, duration  
801 and type of cold exposure required to prevent changes in MAC in patients and whether  
802 there are any contraindications to such interventions in certain populations[82].

803

## 804 **Conclusion**

805 In conclusion, we have provided the first evidence that cold exposure or CT-Exo  
806 protects against arterial calcification in VD-induced mice. Collectively, our findings  
807 suggest a novel mechanism of MAC/senescence associated with a cold environment  
808 (Fig. 8). We have also shown that CT-Exo could protect VSMCs against  
809 calcification/senescence by activating the AMPK/mTOR autophagy pathway and  
810 protecting mice against medial arterial calcification. Plasma-derived exosomes may  
811 explain the hypothermic environment-vascular calcification remission. Moreover, CT-  
812 Exo are rich in miR-320a-3p, which is the molecular basis for CT-Exo to protect against  
813 MAC. Taken together, miR-320a-3p-enriched CT-Exo protect VSMCs against  
814 calcification/senescence by downregulating the expression of PDCD4, thereby  
815 activating the AMPK/mTOR autophagy signalling pathway. These data suggest that  
816 CT-Exo represent a novel molecular mechanism mediating blood-cardiovascular  
817 crosstalk and thus may serve as a novel potential biomarker and new target of  
818 prevention for vascular calcification and CVD.

819

## 820 **Supplementary Information**

821 **Additional file 1: Fig. s1** General appearance of RT and CT group mice after different  
822 temperature treatments. Body weight gain (a) and food consumption (b) of cold exposed  
823 mice and RT controls over 30 days. (c) Alanine aminotransferase (ALT). n = 6 per  
824 group; ns > 0.05; \**p* < 0.05; \*\**p* < 0.01; \*\*\**p* < 0.001; \*\*\*\**p* < 0.0001, unpaired  
825 Student’s t-test. **Fig. s2** (a) Observe the appearance changes and destruction of skin

826 tissue in mice after shaving. (b) General morphology of organs such as the liver, lung,  
827 spleen, heart and kidney. (c) The effect of RT or CT on different organ indices in mice.  
828 (d) Representative histological sections of fixed lungs and livers were embedded in  
829 paraffin and stained with hematoxylin and eosin (H&E) (scale bars, 100  $\mu\text{m}$ ). (e)  
830 Evaluation of interstitial inflammation scores in lung slices of the RT and CT groups.  
831 (f) Wet/dry ratio in lung samples.  $n = 6$  per group,  $ns > 0.05$  and  $*p < 0.05$ , unpaired t  
832 test with Welch's correction. **Fig. s3** (a) Flow chart showing the extraction and isolation  
833 of plasma-derived exosomes. The purification procedure is based on differential  
834 ultracentrifugation. (b) TEM analysis of exosomes. The white scale bar is 100 nm. (c)  
835 Diameter distribution of exosomes. (d) Western blot of exosome-specific proteins  
836 TSG101, CD81 and CD9, which are abundant in CT-Exo and RT-Exo. **Fig. s4**  
837 Fluorescence signals were detected in the organs of mice after execution ( $n = 3$  per  
838 group). **Fig. s5** Representative fluorescence micrograph showing the CT-Exo marker  
839 TSG101 (red) and smooth muscle marker  $\alpha$ -SMA (green) in thoracic aortic sections ( $n$   
840  $= 3$  per group). **Fig. s6** CT-Exo exerted effects on the ROS level and apoptosis of  
841 VSMCs. (a) DCFH-DA measures intracellular ROS production by flow cytometry. (b)  
842 Representative flow cytometric analysis of Annexin V-FITC/PI-stained VSMCs  
843 receiving different treatments for 3 days ( $n = 4$  per group). **Fig. s7** The autophagy  
844 inhibitor 3-MA, through the AMPK/mTOR signalling pathway, effectively inhibited  
845 the ability of CT-Exo to promote osteogenic differentiation. (a) Representative images  
846 of ALP staining of VSMCs that had been pre-treated with the indicated concentrations  
847 of 3-MA or rapamycin for 30 min and then incubated with  $\beta$ -GP for 14 days ( $n = 5$  per  
848 group). The scale bar is 200  $\mu\text{m}$ . (b) Quantitative analysis of the ALP activity. (c, d)  
849 ARS staining showing calcified aorta from CTRL, PS, CT-Exo, 3-MA, CT-Exo+3-MA  
850 and RAPA mice ( $n = 5$  per group). The black scale bar is 200  $\mu\text{m}$ . (e) Vascular calcium  
851 content measurement. (f) The expression of p/t-AMPK and p/t-mTOR was determined  
852 with western blot in calcified VSMCs treated with CT-Exo, 3-MA or 3-MA+CT-Exo  
853 ( $n = 4$  per group). (g) Quantitative analysis of western blotting results. The CTRL group  
854 represented the negative control group with only PBS treatment. The PS group  
855 represented the positive control group with only  $\beta$ -GP treatment. The data are expressed  
856 as the mean  $\pm$  standard deviation. The data were analysed with one-way ANOVA with  
857 the Bonferroni *post hoc* test or the unpaired, two-tailed Student's t-test.  $*p < 0.05$ ;  $**p$   
858  $< 0.01$ ;  $***p < 0.001$ ;  $****p < 0.0001$ . **Fig. s8** The AMPK/mTOR signalling pathway  
859 mediated defensive roles of CT-Exo on calcification/aging of VSMCs. (a) Expression  
860 of p-mTOR and p-AMPK in the  $\beta$ -GP-induced VSMCs treated with Compound C or  
861 MHY1485 were analysed by western blot ( $n = 4$  per group). (b) The data are presented  
862 as densitometric ratios of RUNX2/GAPDH, p/t-mTOR and p/t-AMPK respectively. (c,  
863 d) Representative micrographs of ARS and SA- $\beta$ -gal staining view were shown ( $n = 5$   
864 per group). (e, f) The data are presented as the ratio of positive staining area, shown as  
865 the mean  $\pm$  standard deviation. The data were analysed with one-way ANOVA with the  
866 Bonferroni *post hoc* test or the unpaired, two-tailed Student's t-test.  $*p < 0.05$ ;  $**p <$   
867  $0.01$ ;  $***p < 0.001$ ;  $****p < 0.0001$ . **Fig. s9** siPDCD4 can activate the AMPK/mTOR  
868 signalling pathway to promote VSMCs autophagy. Western blot analysis (a) and  
869 quantification (b) of LC3B, ATG5, p53, p/t-AMPK and p/t-mTOR in VSMCs treated

870 with siPDCD#3 or siRNA control (n = 4 per group). The CTRL group represented the  
871 negative control group with only PBS treatment. The data are presented as the mean ±  
872 standard deviation. The data were analysed one-way ANOVA with the Bonferroni *post*  
873 *hoc* test. \**p* < 0.05; \*\*\*\**p* < 0.0001.

874

### 875 **Acknowledgments**

876 We sincerely thank the animal care staff and technicians of the Animal Experimental  
877 Center of the Second Xiangya Hospital of Central South University for their care and  
878 special treatment of these mice.

879

### 880 **Author's Contributors**

881 Conceptualization: L-Q.Y., F-X-Z.L. and K-X. T. Supervision: F-X-Z.L., S-K.S., F.X.,  
882 M-H.Z., L-M.L. and X.L. Investigation: F-X-Z.L., B.G., C-C.L., K-X.T., Y-C.C., Y-  
883 Y.W., J-Y.D., Y-L.W., S-Y.H., X.C. and F.W. Visualization: F-X-Z.L. and L-Q.Y.  
884 Resources: F-X-Z.L., J-J.L., F.X. and L-Q.Y. Writing—original draft: F-X-Z.L., J-J.L.  
885 and L-Q.Y. Reviewing, editing, and funding acquisition: F.X. and L-Q.Y. All authors  
886 read and approved the final manuscript.

887

### 888 **Funding**

889 This study was supported by the National Natural Science Foundation of China (No.  
890 82071593, 81974223, 81770833 and 82100944), Key R&D Plan Hunan Province  
891 (2020SK2078) and Natural Science Foundation of Hunan Province (No. 2021JJ30036  
892 and 2021JJ40842).

893

### 894 **Availability of data and materials**

895 All data generated and analyzed during this research are included in this published  
896 article.

897

### 898 **Declarations**

899

### 900 **Ethics approval and consent to participate**

901 All experiments were reviewed and approved by the Ethics Committee of the Second  
902 Xiangya Hospital, Central South University. All the procedures conformed to the Guide  
903 for the Care and Use of Laboratory Animals, NIH publication (8th edition, 2011). All  
904 the animal protocols were formally approved by the Ethics Committee of the Second  
905 Xiangya Hospital, Central South University (2022708).

906

### 907 **Consent for publication**

908 All authors agree for publication.

909

### 910 **Competing interests**

911 The authors declare no conflict of interest.

912

### 913 **Author details**

914 <sup>1</sup>Department of Metabolism and Endocrinology, National Clinical Research Center for  
915 Metabolic Disease, Hunan Provincial Key Laboratory of Metabolic Bone Diseases, The  
916 Second Xiangya Hospital, Central South University, Changsha, China. <sup>2</sup>Department of  
917 Periodontal Division, Hunan Xiangya Stomatological Hospital, Central South  
918 University, Changsha, China. <sup>3</sup>Department of Radiology, The Second Xiangya Hospital,  
919 Central South University, Changsha, China. <sup>4</sup>Department of Pathology, The Second  
920 Xiangya Hospital, Central South University, Changsha, China.

921

## 922 **References**

- 923 1. Wee NKY, Nguyen AD, Enriquez RF, Zhang L, Herzog H, Baldock PA. Neuropeptide Y  
924 Regulation of Energy Partitioning and Bone Mass During Cold Exposure. *Calcif Tissue Int.*  
925 2020;107(5):510-23.
- 926 2. Dong M, Yang X, Lim S, Cao Z, Honek J, Lu H, Zhang C, Seki T, Hosaka K, Wahlberg E,  
927 Yang J, Zhang L, Länne T, Sun B, Li X, Liu Y, Zhang Y, Cao Y. Cold exposure promotes  
928 atherosclerotic plaque growth and instability via UCP1-dependent lipolysis. *Cell Metab.*  
929 2013;18(1):118-29.
- 930 3. Sacks D, Baxter B, Campbell BCV, Carpenter JS, Cognard C, Dippel D, Eesa M, Fischer U,  
931 Hausegger K, Hirsch JA, Shazam Hussain M, Jansen O, Jayaraman MV, Khalessi AA, Kluck  
932 BW, Lavine S, Meyers PM, Ramee S, Rüfenacht DA, Schirmer CM, Vorwerk D. Multisociety  
933 Consensus Quality Improvement Revised Consensus Statement for Endovascular Therapy  
934 of Acute Ischemic Stroke. *Int J Stroke.* 2018;13(6):612-32.
- 935 4. Du J, He Z, Xu M, Qu X, Cui J, Zhang S, Zhang S, Li H, Yu Z. Brown Adipose Tissue Rescues  
936 Bone Loss Induced by Cold Exposure. *Front Endocrinol (Lausanne).* 2021;12:778019.
- 937 5. Serrat MA. Environmental temperature impact on bone and cartilage growth. *Compr*  
938 *Physiol.* 2014;4(2):621-55.
- 939 6. Salehipour-Shirazi G, Ferguson LV, Sinclair BJ. Does cold activate the *Drosophila*  
940 *melanogaster* immune system? *J Insect Physiol.* 2017;96:29-34.
- 941 7. Ivanova YM, Blondin DP. Examining the benefits of cold exposure as a therapeutic strategy  
942 for obesity and type 2 diabetes. *J Appl Physiol (1985).* 2021;130(5):1448-59.
- 943 8. Liu C, Yavar Z, Sun Q. Cardiovascular response to thermoregulatory challenges. *Am J*  
944 *Physiol Heart Circ Physiol.* 2015;309(11):H1793-812.
- 945 9. Ungvari Z, Kaley G, de Cabo R, Sonntag WE, Csiszar A. Mechanisms of vascular aging: new  
946 perspectives. *J Gerontol A Biol Sci Med Sci.* 2010;65(10):1028-41.
- 947 10. Reesink KD, Spronck B. Constitutive interpretation of arterial stiffness in clinical studies: a  
948 methodological review. *Am J Physiol Heart Circ Physiol.* 2019;316(3):H693-h709.
- 949 11. Cao YC, Shan SK, Guo B, Li CC, Li FX, Zheng MH, Xu QS, Wang Y, Lei LM, Tang KX, Ou-  
950 Yang WL, Duan JY, Wu YY, Ullah MHE, Zhou ZA, Xu F, Lin X, Wu F, Liao XB, Yuan LQ.  
951 Histone Lysine Methylation Modification and Its Role in Vascular Calcification. *Front*  
952 *Endocrinol (Lausanne).* 2022;13:863708.
- 953 12. Weber T, Chirinos JA. Pulsatile arterial haemodynamics in heart failure. *Eur Heart J.*  
954 2018;39(43):3847-54.
- 955 13. Chirinos JA, Segers P, Hughes T, Townsend R. Large-Artery Stiffness in Health and Disease:  
956 JACC State-of-the-Art Review. *J Am Coll Cardiol.* 2019;74(9):1237-63.
- 957 14. Lanzer P, Hannan FM, Lanzer JD, Janzen J, Raggi P, Furniss D, Schuchardt M, Thakker R,

- 958 Fok PW, Saez-Rodriguez J, Millan A, Sato Y, Ferraresi R, Virmani R, St Hilaire C. Medial  
959 Arterial Calcification: JACC State-of-the-Art Review. *J Am Coll Cardiol*. 2021;78(11):1145-  
960 65.
- 961 15. Boström K, Watson KE, Horn S, Wortham C, Herman IM, Demer LL. Bone morphogenetic  
962 protein expression in human atherosclerotic lesions. *J Clin Invest*. 1993;91(4):1800-9.
- 963 16. Xu F, Li FX, Lin X, Zhong JY, Wu F, Shan SK, Tan CM, Yuan LQ, Liao XB. Adipose tissue-  
964 derived omentin-1 attenuates arterial calcification via AMPK/Akt signaling pathway. *Aging*  
965 (Albany NY). 2019;11(20):8760-76.
- 966 17. Ye Y, Chen A, Li L, Liang Q, Wang S, Dong Q, Fu M, Lan Z, Li Y, Liu X, Ou JS, Lu L, Yan J.  
967 Repression of the antiporter SLC7A11/glutathione/glutathione peroxidase 4 axis drives  
968 ferroptosis of vascular smooth muscle cells to facilitate vascular calcification. *Kidney Int*.  
969 2022;102(6):1259-75.
- 970 18. Lan Z, Chen A, Li L, Ye Y, Liang Q, Dong Q, Wang S, Fu M, Li Y, Liu X, Zhu Z, Ou JS, Qiu X,  
971 Lu L, Yan J. Downregulation of HDAC9 by the ketone metabolite  $\beta$ -hydroxybutyrate  
972 suppresses vascular calcification. *J Pathol*. 2022;258(3):213-26.
- 973 19. Liu X, Chen A, Liang Q, Yang X, Dong Q, Fu M, Wang S, Li Y, Ye Y, Lan Z, Chen Y, Ou JS,  
974 Yang P, Lu L, Yan J. Spermidine inhibits vascular calcification in chronic kidney disease  
975 through modulation of SIRT1 signaling pathway. *Aging Cell*. 2021;20(6):e13377.
- 976 20. Théry C, Witwer KW, Aikawa E, Alcaraz MJ, Anderson JD, Andriantsitohaina R, Antoniou A,  
977 Arab T, Archer F, Atkin-Smith GK, Ayre DC, Bach JM, Bachurski D, Baharvand H, Balaj L,  
978 Baldacchino S, Bauer NN, Baxter AA, Bebawy M, Beckham C, Bedina Zavec A, Benmoussa  
979 A, Berardi AC, Bergese P, Bielska E, Blenkiron C, Bobis-Wozowicz S, Boilard E, Boireau W,  
980 Bongiovanni A, Borràs FE, Bosch S, Boulanger CM, Breakefield X, Breglio AM, Brennan M,  
981 Brigstock DR, Brisson A, Broekman ML, Bromberg JF, Bryl-Górecka P, Buch S, Buck AH,  
982 Burger D, Busatto S, Buschmann D, Bussolati B, Buzás EI, Byrd JB, Camussi G, Carter DR,  
983 Caruso S, Chamley LW, Chang YT, Chen C, Chen S, Cheng L, Chin AR, Clayton A, Clerici  
984 SP, Cocks A, Cocucci E, Coffey RJ, Cordeiro-da-Silva A, Couch Y, Coumans FA, Coyle B,  
985 Crescitelli R, Criado MF, D'Souza-Schorey C, Das S, Datta Chaudhuri A, de Candia P, De  
986 Santana EF, De Wever O, Del Portillo HA, Demaret T, Deville S, Devitt A, Dhondt B, Di Vizio  
987 D, Dieterich LC, Dolo V, Dominguez Rubio AP, Dominici M, Dourado MR, Driedonks TA,  
988 Duarte FV, Duncan HM, Eichenberger RM, Ekström K, El Andaloussi S, Elie-Caille C,  
989 Erdbrügger U, Falcón-Pérez JM, Fatima F, Fish JE, Flores-Bellver M, Försönits A, Frelet-  
990 Barrand A, Fricke F, Fuhrmann G, Gabrielsson S, Gámez-Valero A, Gardiner C, Gärtner K,  
991 Gaudin R, Gho YS, Giebel B, Gilbert C, Gimona M, Giusti I, Goberdhan DC, Görgens A,  
992 Gorski SM, Greening DW, Gross JC, Gualerzi A, Gupta GN, Gustafson D, Handberg A,  
993 Haraszti RA, Harrison P, Hegyesi H, Hendrix A, Hill AF, Hochberg FH, Hoffmann KF, Holder  
994 B, Holthofer H, Hosseinkhani B, Hu G, Huang Y, Huber V, Hunt S, Ibrahim AG, Ikezu T, Inal  
995 JM, Isin M, Ivanova A, Jackson HK, Jacobsen S, Jay SM, Jayachandran M, Jenster G, Jiang  
996 L, Johnson SM, Jones JC, Jong A, Jovanovic-Talisman T, Jung S, Kalluri R, Kano SI, Kaur S,  
997 Kawamura Y, Keller ET, Khamari D, Khomyakova E, Khvorova A, Kierulf P, Kim KP, Kislinger  
998 T, Klingeborn M, Klinke DJ, 2nd, Kornek M, Kosanović MM, Kovács Á F, Krämer-Albers EM,  
999 Krasemann S, Krause M, Kurochkin IV, Kusuma GD, Kuypers S, Laitinen S, Langevin SM,  
1000 Languino LR, Lannigan J, Lässer C, Laurent LC, Lavieu G, Lázaro-Ibáñez E, Le Lay S, Lee  
1001 MS, Lee YXF, Lemos DS, Lenassi M, Leszczynska A, Li IT, Liao K, Libregts SF, Ligeti E, Lim

1002 R, Lim SK, Linē A, Linnemannstōns K, Llorente A, Lombard CA, Lorenowicz MJ, Lōrincz Á  
 1003 M, Lōtvall J, Lovett J, Lowry MC, Loyer X, Lu Q, Lukomska B, Lunavat TR, Maas SL, Malhi  
 1004 H, Marcilla A, Mariani J, Mariscal J, Martens-Uzunova ES, Martin-Jaular L, Martinez MC,  
 1005 Martins VR, Mathieu M, Mathivanan S, Maugeri M, McGinnis LK, McVey MJ, Meckes DG,  
 1006 Jr., Meehan KL, Mertens I, Minciacchi VR, Mōller A, Mōller Jōrgensen M, Morales-  
 1007 Kastresana A, Morhayim J, Mullier F, Muraca M, Musante L, Mussack V, Muth DC, Myburgh  
 1008 KH, Najrana T, Nawaz M, Nazarenko I, Nejsun P, Neri C, Neri T, Nieuwland R, Nimrichter  
 1009 L, Nolan JP, Nolte-'t Hoen EN, Noren Hooten N, O'Driscoll L, O'Grady T, O'Loghlen A,  
 1010 Ochiya T, Olivier M, Ortiz A, Ortiz LA, Osteikoetxea X, Østergaard O, Ostrowski M, Park J,  
 1011 Pegtel DM, Peinado H, Perut F, Pfaffl MW, Phinney DG, Pieters BC, Pink RC, Pisetsky DS,  
 1012 Pogge von Strandmann E, Polakovicova I, Poon IK, Powell BH, Prada I, Pulliam L,  
 1013 Quesenberry P, Radeghieri A, Raffai RL, Raimondo S, Rak J, Ramirez MI, Raposo G, Rayyan  
 1014 MS, Regev-Rudzki N, Ricklefs FL, Robbins PD, Roberts DD, Rodrigues SC, Rohde E, Rome  
 1015 S, Rouschop KM, Rughetti A, Russell AE, Saá P, Sahoo S, Salas-Huenuleo E, Sánchez C,  
 1016 Saugstad JA, Saul MJ, Schiffelers RM, Schneider R, Schøyen TH, Scott A, Shahaj E, Sharma  
 1017 S, Shatnyeva O, Shekari F, Shelke GV, Shetty AK, Shiba K, Siljander PR, Silva AM, Skowronek  
 1018 A, Snyder OL, 2nd, Soares RP, Sōdar BW, Soekmadji C, Sotillo J, Stahl PD, Stoorvogel W,  
 1019 Stott SL, Strasser EF, Swift S, Tahara H, Tewari M, Timms K, Tiwari S, Tixeira R, Tkach M,  
 1020 Toh WS, Tomasini R, Torrecilhas AC, Tosar JP, Toxavidis V, Urbanelli L, Vader P, van Balkom  
 1021 BW, van der Grein SG, Van Deun J, van Herwijnen MJ, Van Keuren-Jensen K, van Niel G,  
 1022 van Royen ME, van Wijnen AJ, Vasconcelos MH, Vechetti IJ, Jr., Veit TD, Vella LJ, Velot É,  
 1023 Verweij FJ, Vestad B, Viñas JL, Visnovitz T, Vukman KV, Wahlgren J, Watson DC, Wauben  
 1024 MH, Weaver A, Webber JP, Weber V, Wehman AM, Weiss DJ, Welsh JA, Wendt S,  
 1025 Wheelock AM, Wiener Z, Witte L, Wolfram J, Xagorari A, Xander P, Xu J, Yan X, Yáñez-Mó  
 1026 M, Yin H, Yuana Y, Zappulli V, Zarubova J, Žēkas V, Zhang JY, Zhao Z, Zheng L, Zheutlin  
 1027 AR, Zickler AM, Zimmermann P, Zivkovic AM, Zocco D, Zuba-Surma EK. Minimal  
 1028 information for studies of extracellular vesicles 2018 (MISEV2018): a position statement of  
 1029 the International Society for Extracellular Vesicles and update of the MISEV2014 guidelines.  
 1030 *J Extracell Vesicles*. 2018;7(1):1535750.

1031 21. Luo ZW, Li FX, Liu YW, Rao SS, Yin H, Huang J, Chen CY, Hu Y, Zhang Y, Tan YJ, Yuan LQ,  
 1032 Chen TH, Liu HM, Cao J, Liu ZZ, Wang ZX, Xie H. Aptamer-functionalized exosomes from  
 1033 bone marrow stromal cells target bone to promote bone regeneration. *Nanoscale*.  
 1034 2019;11(43):20884-92.

1035 22. Liu J, Li F, Liu B, Yao Z, Li L, Liu G, Peng L, Wang Y, Huang J. Adipose-derived mesenchymal  
 1036 stem cell exosomes inhibit transforming growth factor-β1-induced collagen synthesis in  
 1037 oral mucosal fibroblasts. *Exp Ther Med*. 2021;22(6):1419.

1038 23. Li FX, Lin X, Xu F, Shan SK, Guo B, Lei LM, Zheng MH, Wang Y, Xu QS, Yuan LQ. The Role  
 1039 of Mesenchymal Stromal Cells-Derived Small Extracellular Vesicles in Diabetes and Its  
 1040 Chronic Complications. *Front Endocrinol (Lausanne)*. 2021;12:780974.

1041 24. Li FX, Liu JJ, Xu F, Lin X, Zhong JY, Wu F, Yuan LQ. Role of tumor-derived exosomes in  
 1042 bone metastasis. *Oncol Lett*. 2019;18(4):3935-45.

1043 25. Wu YL, Lin ZJ, Li CC, Lin X, Shan SK, Guo B, Zheng MH, Li F, Yuan LQ, Li ZH. Epigenetic  
 1044 regulation in metabolic diseases: mechanisms and advances in clinical study. *Signal  
 1045 Transduct Target Ther*. 2023;8(1):98.



- 1046 26. Wang ZX, Luo ZW, Li FX, Cao J, Rao SS, Liu YW, Wang YY, Zhu GQ, Gong JS, Zou JT, Wang  
1047 Q, Tan YJ, Zhang Y, Hu Y, Li YY, Yin H, Wang XK, He ZH, Ren L, Liu ZZ, Hu XK, Yuan LQ,  
1048 Xu R, Chen CY, Xie H. Aged bone matrix-derived extracellular vesicles as a messenger for  
1049 calcification paradox. *Nat Commun.* 2022;13(1):1453.
- 1050 27. Lin X, Shan SK, Xu F, Zhong JY, Wu F, Duan JY, Guo B, Li FX, Wang Y, Zheng MH, Xu QS,  
1051 Lei LM, Ou-Yang WL, Wu YY, Tang KX, Ullah MHE, Liao XB, Yuan LQ. The crosstalk  
1052 between endothelial cells and vascular smooth muscle cells aggravates high phosphorus-  
1053 induced arterial calcification. *Cell Death Dis.* 2022;13(7):650.
- 1054 28. Guo B, Shan SK, Xu F, Lin X, Li FX, Wang Y, Xu QS, Zheng MH, Lei LM, Li CC, Zhou ZA,  
1055 Ullah MHE, Wu F, Liao XB, Yuan LQ. Protective role of small extracellular vesicles derived  
1056 from HUVECs treated with AGEs in diabetic vascular calcification. *J Nanobiotechnology.*  
1057 2022;20(1):334.
- 1058 29. Wu YY, Shan SK, Lin X, Xu F, Zhong JY, Wu F, Duan JY, Guo B, Li FX, Wang Y, Zheng MH,  
1059 Xu QS, Lei LM, Ou-Yang WL, Tang KX, Li CC, Ullah MHE, Yuan LQ. Cellular Crosstalk in the  
1060 Vascular Wall Microenvironment: The Role of Exosomes in Vascular Calcification. *Front*  
1061 *Cardiovasc Med.* 2022;9:912358.
- 1062 30. Fleming A, Bourdenx M, Fujimaki M, Karabiyik C, Krause GJ, Lopez A, Martín-Segura A,  
1063 Puri C, Scrivero A, Skidmore J, Son SM, Stamatakou E, Wrobel L, Zhu Y, Cuervo AM,  
1064 Rubinsztein DC. The different autophagy degradation pathways and neurodegeneration.  
1065 *Neuron.* 2022;110(6):935-66.
- 1066 31. Menzies FM, Fleming A, Caricasole A, Bento CF, Andrews SP, Ashkenazi A, Füllgrabe J,  
1067 Jackson A, Jimenez Sanchez M, Karabiyik C, Licitra F, Lopez Ramirez A, Pavel M, Puri C,  
1068 Renna M, Ricketts T, Schlotawa L, Vicinanza M, Won H, Zhu Y, Skidmore J, Rubinsztein DC.  
1069 Autophagy and Neurodegeneration: Pathogenic Mechanisms and Therapeutic  
1070 Opportunities. *Neuron.* 2017;93(5):1015-34.
- 1071 32. White E, Lattime EC, Guo JY. Autophagy Regulates Stress Responses, Metabolism, and  
1072 Anticancer Immunity. *Trends Cancer.* 2021;7(8):778-89.
- 1073 33. Deretic V. Autophagy in inflammation, infection, and immunometabolism. *Immunity.*  
1074 2021;54(3):437-53.
- 1075 34. Gao W, Wang X, Zhou Y, Wang X, Yu Y. Autophagy, ferroptosis, pyroptosis, and  
1076 necroptosis in tumor immunotherapy. *Signal Transduct Target Ther.* 2022;7(1):196.
- 1077 35. Kaushik S, Tasset I, Arias E, Pampliega O, Wong E, Martinez-Vicente M, Cuervo AM.  
1078 Autophagy and the hallmarks of aging. *Ageing Res Rev.* 2021;72:101468.
- 1079 36. Wilhelm T, Richly H. Autophagy during ageing - from Dr Jekyll to Mr Hyde. *Febs j.*  
1080 2018;285(13):2367-76.
- 1081 37. Qiao L, Ma J, Zhang Z, Sui W, Zhai C, Xu D, Wang Z, Lu H, Zhang M, Zhang C, Chen W,  
1082 Zhang Y. Deficient Chaperone-Mediated Autophagy Promotes Inflammation and  
1083 Atherosclerosis. *Circ Res.* 2021;129(12):1141-57.
- 1084 38. Tao H, Yancey PG, Blakemore JL, Zhang Y, Ding L, Jerome WG, Brown JD, Vickers KC,  
1085 Linton MF. Macrophage SR-BI modulates autophagy via VPS34 complex and PPAR $\alpha$   
1086 transcription of Tfeb in atherosclerosis. *J Clin Invest.* 2021;131(7).
- 1087 39. Chen Z, Ouyang C, Zhang H, Gu Y, Deng Y, Du C, Cui C, Li S, Wang W, Kong W, Chen J,  
1088 Cai J, Geng B. Vascular smooth muscle cell-derived hydrogen sulfide promotes  
1089 atherosclerotic plaque stability via TFEB (transcription factor EB)-mediated autophagy.

- 1090 Autophagy. 2022;1-18.
- 1091 40. Forte M, Bianchi F, Cotugno M, Marchitti S, De Falco E, Raffa S, Stanzione R, Di Nonno F,  
1092 Chimenti I, Palmerio S, Pagano F, Petrozza V, Micaloni A, Madonna M, Relucenti M, Torrisi  
1093 MR, Frati G, Volpe M, Rubattu S, Sciarretta S. Pharmacological restoration of autophagy  
1094 reduces hypertension-related stroke occurrence. *Autophagy*. 2020;16(8):1468-81.
- 1095 41. Li FF, Shang XK, Du XL, Chen S. Rapamycin Treatment Attenuates Angiotensin II -induced  
1096 Abdominal Aortic Aneurysm Formation via VSMC Phenotypic Modulation and Down-  
1097 regulation of ERK1/2 Activity. *Curr Med Sci*. 2018;38(1):93-100.
- 1098 42. Peng YQ, Xiong D, Lin X, Cui RR, Xu F, Zhong JY, Zhu T, Wu F, Mao MZ, Liao XB, Yuan LQ.  
1099 Oestrogen Inhibits Arterial Calcification by Promoting Autophagy. *Sci Rep*. 2017;7(1):3549.
- 1100 43. Horowitz AM, Fan X, Bieri G, Smith LK, Sanchez-Diaz CI, Schroer AB, Gontier G, Casaletto  
1101 KB, Kramer JH, Williams KE, Villeda SA. Blood factors transfer beneficial effects of exercise  
1102 on neurogenesis and cognition to the aged brain. *Science*. 2020;369(6500):167-73.
- 1103 44. Dinkins MB, Dasgupta S, Wang G, Zhu G, Bieberich E. Exosome reduction in vivo is  
1104 associated with lower amyloid plaque load in the 5XFAD mouse model of Alzheimer's  
1105 disease. *Neurobiol Aging*. 2014;35(8):1792-800.
- 1106 45. Xu F, Zhong JY, Lin X, Shan SK, Guo B, Zheng MH, Wang Y, Li F, Cui RR, Wu F, Zhou E,  
1107 Liao XB, Liu YS, Yuan LQ. Melatonin alleviates vascular calcification and ageing through  
1108 exosomal miR-204/miR-211 cluster in a paracrine manner. *J Pineal Res*.  
1109 2020;68(3):e12631.
- 1110 46. Wu F, Lin X, Shan SK, Li F, Xu F, Zhong JY, Guo B, Zheng MH, Wang Y, Mo ZH, Yuan LQ.  
1111 The Suppression of miR-199a-3p by Promoter Methylation Contributes to Papillary  
1112 Thyroid Carcinoma Aggressiveness by Targeting RAP2a and DNMT3a. *Front Cell Dev Biol*.  
1113 2020;8:594528.
- 1114 47. Viegas CSB, Santos L, Macedo AL, Matos AA, Silva AP, Neves PL, Staes A, Gevaert K, Morais  
1115 R, Vermeer C, Schurgers L, Simes DC. Chronic Kidney Disease Circulating Calciprotein  
1116 Particles and Extracellular Vesicles Promote Vascular Calcification: A Role for GRP (Gla-  
1117 Rich Protein). *Arterioscler Thromb Vasc Biol*. 2018;38(3):575-87.
- 1118 48. Tai S, Hu XQ, Peng DQ, Zhou SH, Zheng XL. The roles of autophagy in vascular smooth  
1119 muscle cells. *Int J Cardiol*. 2016;211:1-6.
- 1120 49. Piwkowska A, Rogacka D, Jankowski M, Dominiczak MH, Stepiński JK, Angielski S.  
1121 Metformin induces suppression of NAD(P)H oxidase activity in podocytes. *Biochem*  
1122 *Biophys Res Commun*. 2010;393(2):268-73.
- 1123 50. Kim J, Kundu M, Viollet B, Guan KL. AMPK and mTOR regulate autophagy through direct  
1124 phosphorylation of Ulk1. *Nat Cell Biol*. 2011;13(2):132-41.
- 1125 51. Egan D, Kim J, Shaw RJ, Guan KL. The autophagy initiating kinase ULK1 is regulated via  
1126 opposing phosphorylation by AMPK and mTOR. *Autophagy*. 2011;7(6):643-4.
- 1127 52. Wang S, Song P, Zou MH. AMP-activated protein kinase, stress responses and  
1128 cardiovascular diseases. *Clin Sci (Lond)*. 2012;122(12):555-73.
- 1129 53. Zhang C, Wang X. miR-320a Targeting RGS5 Aggravates Atherosclerosis by Promoting  
1130 Migration and Proliferation of ox-LDL-Stimulated Vascular Smooth Muscle Cells. *J*  
1131 *Cardiovasc Pharmacol*. 2022;80(1):110-17.
- 1132 54. Lankat-Buttgereit B, Göke R. The tumour suppressor Pcd4: recent advances in the  
1133 elucidation of function and regulation. *Biol Cell*. 2009;101(6):309-17.

- 1134 55. Song X, Zhang X, Wang X, Zhu F, Guo C, Wang Q, Shi Y, Wang J, Chen Y, Zhang L. Tumor  
1135 suppressor gene PDCD4 negatively regulates autophagy by inhibiting the expression of  
1136 autophagy-related gene ATG5. *Autophagy*. 2013;9(5):743-55.
- 1137 56. Wang L, Jiang Y, Song X, Guo C, Zhu F, Wang X, Wang Q, Shi Y, Wang J, Gao F, Zhao W,  
1138 Chen YH, Zhang L. Pcd4 deficiency enhances macrophage lipofautophagy and attenuates  
1139 foam cell formation and atherosclerosis in mice. *Cell Death Dis*. 2016;7(1):e2055.
- 1140 57. Bell JF, Moore GJ. Effects of high ambient temperature on various stages of rabies virus  
1141 infection in mice. *Infect Immun*. 1974;10(3):510-5.
- 1142 58. Amrein YU. Effects of environmental temperature on *Trypanosoma cruzi* infection in mice.  
1143 *J Parasitol*. 1967;53(6):1160.
- 1144 59. Kokolus KM, Capitano ML, Lee CT, Eng JW, Waight JD, Hylander BL, Sexton S, Hong CC,  
1145 Gordon CJ, Abrams SI, Repasky EA. Baseline tumor growth and immune control in  
1146 laboratory mice are significantly influenced by subthermoneutral housing temperature.  
1147 *Proc Natl Acad Sci U S A*. 2013;110(50):20176-81.
- 1148 60. Simonsick EM, Meier HCS, Shaffer NC, Studenski SA, Ferrucci L. Basal body temperature  
1149 as a biomarker of healthy aging. *Age (Dordr)*. 2016;38(5-6):445-54.
- 1150 61. Chang L, Villacorta L, Li R, Hamblin M, Xu W, Dou C, Zhang J, Wu J, Zeng R, Chen YE. Loss  
1151 of perivascular adipose tissue on peroxisome proliferator-activated receptor- $\gamma$  deletion  
1152 in smooth muscle cells impairs intravascular thermoregulation and enhances  
1153 atherosclerosis. *Circulation*. 2012;126(9):1067-78.
- 1154 62. Reynés B, van Schothorst EM, García-Ruiz E, Keijzer J, Palou A, Oliver P. Cold exposure  
1155 down-regulates immune response pathways in ferret aortic perivascular adipose tissue.  
1156 *Thromb Haemost*. 2017;117(5):981-91.
- 1157 63. Tian XY, Ganeshan K, Hong C, Nguyen KD, Qiu Y, Kim J, Tangirala RK, Tontonoz P, Chawla  
1158 A. Thermoneutral Housing Accelerates Metabolic Inflammation to Potentiate  
1159 Atherosclerosis but Not Insulin Resistance. *Cell Metab*. 2016;23(1):165-78.
- 1160 64. Zhang X, Zhang Y, Wang P, Zhang SY, Dong Y, Zeng G, Yan Y, Sun L, Wu Q, Liu H, Liu B,  
1161 Kong W, Wang X, Jiang C. Adipocyte Hypoxia-Inducible Factor 2 $\alpha$  Suppresses  
1162 Atherosclerosis by Promoting Adipose Ceramide Catabolism. *Cell Metab*. 2019;30(5):937-  
1163 51.e5.
- 1164 65. Chen R, Yin P, Wang L, Liu C, Niu Y, Wang W, Jiang Y, Liu Y, Liu J, Qi J, You J, Kan H, Zhou  
1165 M. Association between ambient temperature and mortality risk and burden: time series  
1166 study in 272 main Chinese cities. *Bmj*. 2018;363:k4306.
- 1167 66. Chevalier C, Stojanović O, Colin DJ, Suarez-Zamorano N, Tarallo V, Veyrat-Durebex C,  
1168 Rigo D, Fabbiano S, Stevanović A, Hagemann S, Montet X, Seimbille Y, Zamboni N,  
1169 Hapfelmeier S, Trajkovski M. Gut Microbiota Orchestrates Energy Homeostasis during  
1170 Cold. *Cell*. 2015;163(6):1360-74.
- 1171 67. Bukowiecki LJ. Energy balance and diabetes. The effects of cold exposure, exercise training,  
1172 and diet composition on glucose tolerance and glucose metabolism in rat peripheral  
1173 tissues. *Can J Physiol Pharmacol*. 1989;67(4):382-93.
- 1174 68. Shanahan CM. Mechanisms of vascular calcification in CKD-evidence for premature  
1175 ageing? *Nat Rev Nephrol*. 2013;9(11):661-70.
- 1176 69. Dai XY, Zhao MM, Cai Y, Guan QC, Zhao Y, Guan Y, Kong W, Zhu WG, Xu MJ, Wang X.  
1177 Phosphate-induced autophagy counteracts vascular calcification by reducing matrix

1178 vesicle release. *Kidney Int.* 2013;83(6):1042-51.

1179 70. Lin X, Xu F, Cui RR, Xiong D, Zhong JY, Zhu T, Li F, Wu F, Xie XB, Mao MZ, Liao XB, Yuan  
1180 LQ. Arterial Calcification Is Regulated Via an miR-204/DNMT3a Regulatory Circuit Both In  
1181 Vitro and in Female Mice. *Endocrinology.* 2018;159(8):2905-16.

1182 71. Cui RR, Li SJ, Liu LJ, Yi L, Liang QH, Zhu X, Liu GY, Liu Y, Wu SS, Liao XB, Yuan LQ, Mao DA,  
1183 Liao EY. MicroRNA-204 regulates vascular smooth muscle cell calcification in vitro and in  
1184 vivo. *Cardiovasc Res.* 2012;96(2):320-9.

1185 72. Hao J, Zhang L, Cong G, Ren L, Hao L. MicroRNA-34b/c inhibits aldosterone-induced  
1186 vascular smooth muscle cell calcification via a SATB2/Runx2 pathway. *Cell Tissue Res.*  
1187 2016;366(3):733-46.

1188 73. Pantsulaia I, Ciszewski WM, Niewiarowska J. Senescent endothelial cells: Potential  
1189 modulators of immunosenescence and ageing. *Ageing Res Rev.* 2016;29:13-25.

1190 74. Yang L, Cheng P, Chen C, He HB, Xie GQ, Zhou HD, Xie H, Wu XP, Luo XH. miR-93/Sp7  
1191 function loop mediates osteoblast mineralization. *J Bone Miner Res.* 2012;27(7):1598-606.

1192 75. Maegdefessel L, Rayner KJ, Leeper NJ. MicroRNA regulation of vascular smooth muscle  
1193 function and phenotype: early career committee contribution. *Arterioscler Thromb Vasc  
1194 Biol.* 2015;35(1):2-6.

1195 76. Lee S, Choi E, Cha MJ, Park AJ, Yoon C, Hwang KC. Impact of miRNAs on cardiovascular  
1196 aging. *J Geriatr Cardiol.* 2015;12(5):569-74.

1197 77. Wang CG, Hu YH, Su SL, Zhong D. LncRNA DANCR and miR-320a suppressed osteogenic  
1198 differentiation in osteoporosis by directly inhibiting the Wnt/ $\beta$ -catenin signaling pathway.  
1199 *Exp Mol Med.* 2020;52(8):1310-25.

1200 78. De-Ugarte L, Yoskovitz G, Balcells S, Güerri-Fernández R, Martínez-Díaz S, Mellibovsky L,  
1201 Urreiziti R, Nogués X, Grinberg D, García-Giralt N, Díez-Pérez A. MiRNA profiling of whole  
1202 trabecular bone: identification of osteoporosis-related changes in MiRNAs in human hip  
1203 bones. *BMC Med Genomics.* 2015;8:75.

1204 79. Sheedy FJ, Palsson-McDermott E, Hennessy EJ, Martin C, O'Leary JJ, Ruan Q, Johnson DS,  
1205 Chen Y, O'Neill LA. Negative regulation of TLR4 via targeting of the proinflammatory  
1206 tumor suppressor PDCD4 by the microRNA miR-21. *Nat Immunol.* 2010;11(2):141-7.

1207 80. Jiang Y, Gao Q, Wang L, Guo C, Zhu F, Wang B, Wang Q, Gao F, Chen Y, Zhang L.  
1208 Deficiency of programmed cell death 4 results in increased IL-10 expression by  
1209 macrophages and thereby attenuates atherosclerosis in hyperlipidemic mice. *Cell Mol  
1210 Immunol.* 2016;13(4):524-34.

1211 81. Cheng Y, Zhu P, Yang J, Liu X, Dong S, Wang X, Chun B, Zhuang J, Zhang C. Ischaemic  
1212 preconditioning-regulated miR-21 protects heart against ischaemia/reperfusion injury via  
1213 anti-apoptosis through its target PDCD4. *Cardiovasc Res.* 2010;87(3):431-9.

1214 82. Blondin DP, Haman F. Shivering and nonshivering thermogenesis in skeletal muscles.  
1215 *Handb Clin Neurol.* 2018;156:153-73.

1216

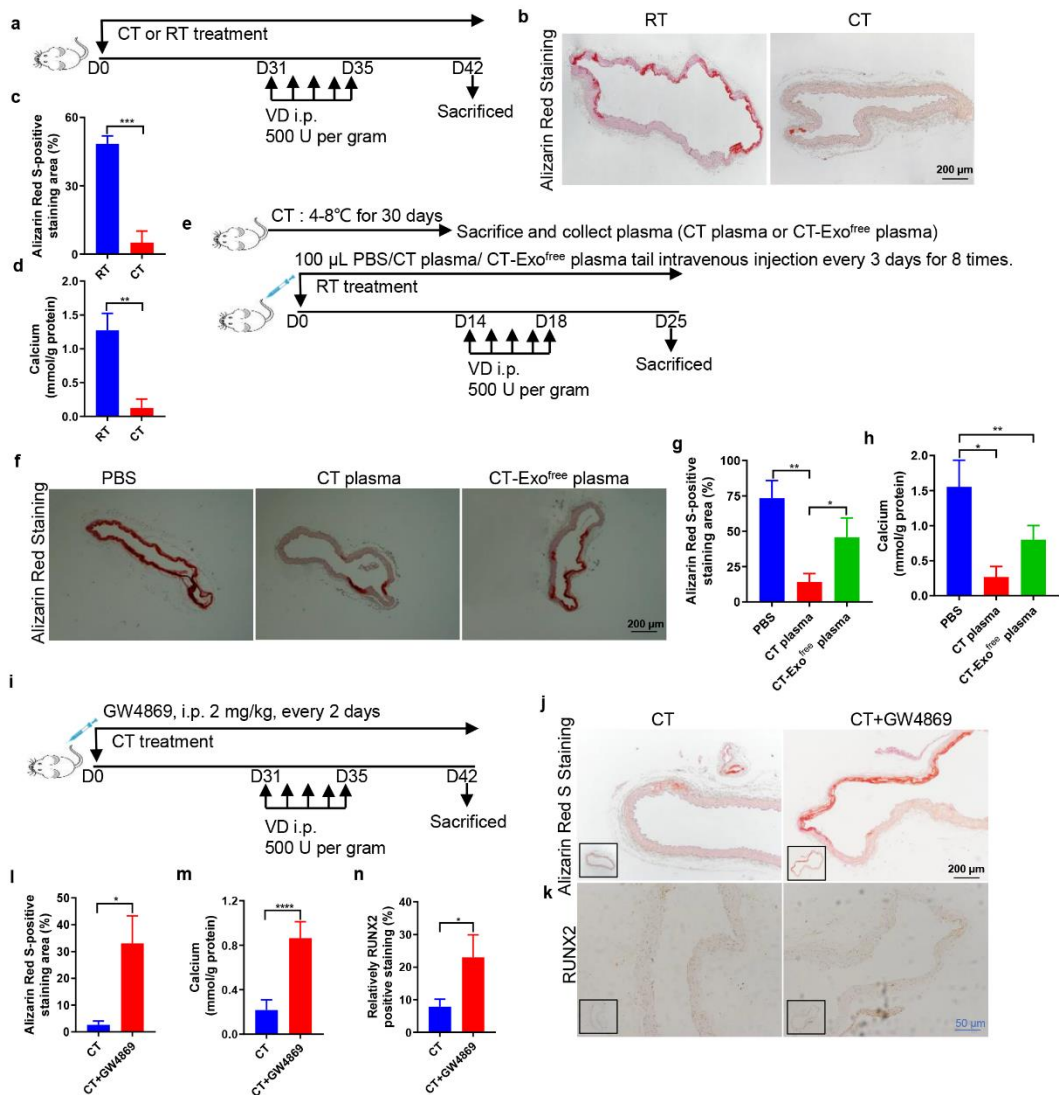

1217

1218 **Fig. 1 Cold exposure protected against MAC in a VD-induced mouse model.** (a)

1219 The schematic flow diagram represents the *in vivo* treatment of CT or RT in the VD-

1220 treated mouse model (n = 6 per group). ARS-stained sections from thoracic aorta (b)

1221 and quantitation of positive staining area (c) are shown. The black scale bar is 200  $\mu$ m.

1222 (d) Vascular calcium content measurement. (e) Experimental design of the VD-induced

1223 vascular calcification mouse model treated with PBS, CT plasma or CT-Exo<sup>free</sup> plasma

1224 by intravenous injection (n = 6 per group). ARS-stained sections from thoracic aorta (f)

1225 and quantitation of the positive staining area (g) are shown. The black scale bar is 200

1226  $\mu$ m. (h) Calcium content of the thoracic aorta. (i) Schematic flow diagram represented

1227 the *in vivo* treatment of CT with or without GW4869 in the VD-induced mice model (n

1228 = 6 per group). Evaluation of the effect of pre-treatment of the exosome blocker

1229 GW4869 on arterial calcification induced by VD calcified mice in CT treatment. ARS

1230 staining (j, l) and RUNX2 expression (k, n) analysis of paraffin-embedded vascular

1231 tissue from mice. (m) Vascular calcium content measurement. The black scale bar is

1232 200  $\mu\text{m}$  and the blue scale bar is 50  $\mu\text{m}$ . The data are presented as the mean  $\pm$  standard  
 1233 deviation with three replicates for each group. The data were analysed with Student's  
 1234 t-test or one-way ANOVA with the Bonferroni *post hoc* test. \* $p < 0.05$ ; \*\* $p < 0.01$ ;  
 1235 \*\*\* $p < 0.001$ ; \*\*\*\* $p < 0.0001$ .

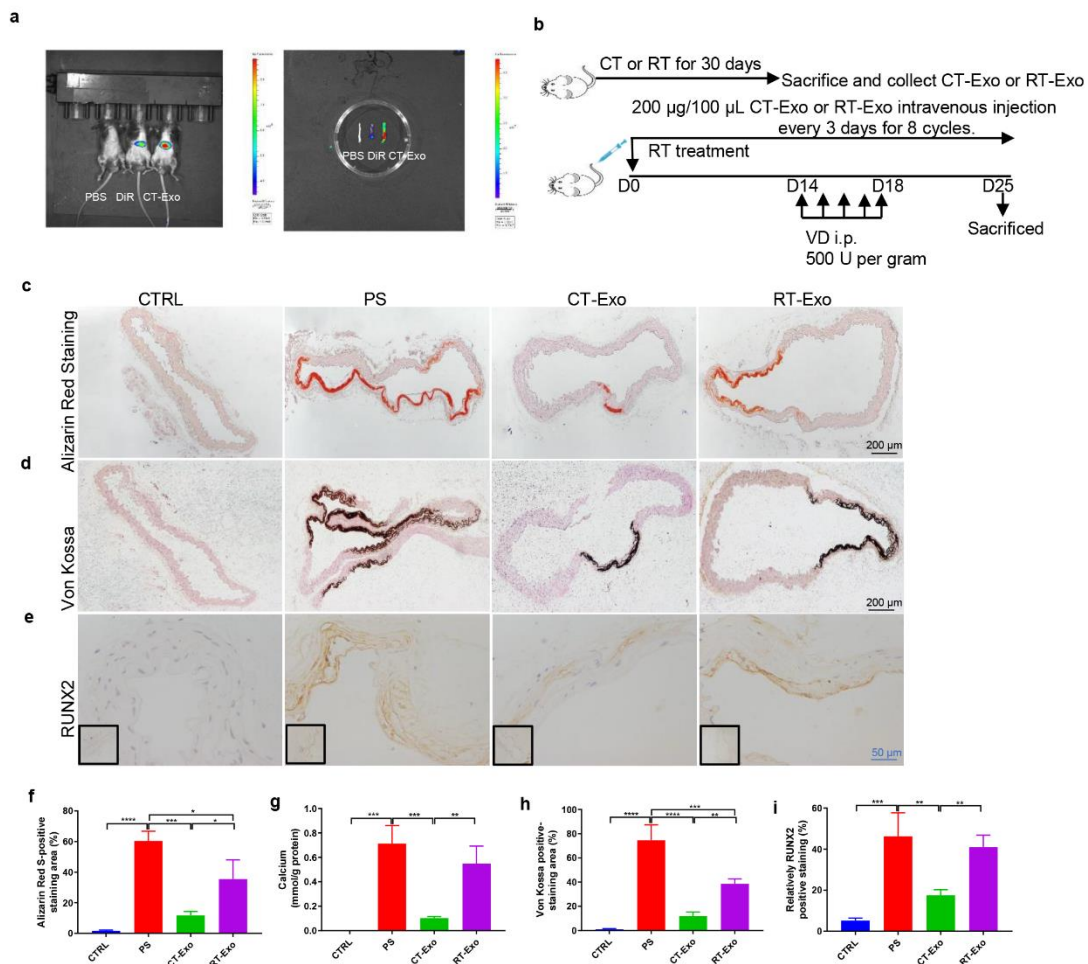

1236  
 1237 **Fig. 2 CT-Exo protected against vascular calcification in the VD-induced mouse**  
 1238 **model.** (a) Uptake of DiR-labelled CT-Exo in aortic VSMCs of mice. The mice were  
 1239 subjected to the intravenous administration of PBS, DiR or DiR-labelled CT-Exo  
 1240 treatments (100  $\mu\text{g}/\text{mice}$ ,  $n = 3$  per group). Representative *in vivo* fluorescence image  
 1241 of CT-Exo distribution in mice 24 h after CT-Exo injection. (b) Experimental design of  
 1242 the VD-induced vascular calcification mouse model treated with PBS, CT-Exo or RT-  
 1243 Exo by intravenous injection ( $n = 6$  per group). ARS (c) and Von Kossa staining (d) and  
 1244 quantification of the percentages of ARS+ (f) and Von Kossa+ (h) areas. (g) Vascular  
 1245 calcium content measurement. RUNX2 expression in thoracic aorta (e) and quantitation  
 1246 of positive staining area (i) are shown. The black scale bar is 200  $\mu\text{m}$  and the blue scale

1247 bar is 50  $\mu\text{m}$ . The CTRL group represents the negative control group with only PBS  
 1248 treatment. The PS group represents the positive control group with only  $\beta\text{-GP}$  treatment.  
 1249 The data are presented as the mean  $\pm$  standard deviation with three replicates for each  
 1250 group. The data were analysed with one-way ANOVA with the Bonferroni *post hoc* test  
 1251 or the unpaired, two-tailed Student's *t*-test. \* $p < 0.05$ ; \*\* $p < 0.01$ ; \*\*\* $p < 0.001$ ; \*\*\*\* $p$   
 1252  $< 0.0001$ .

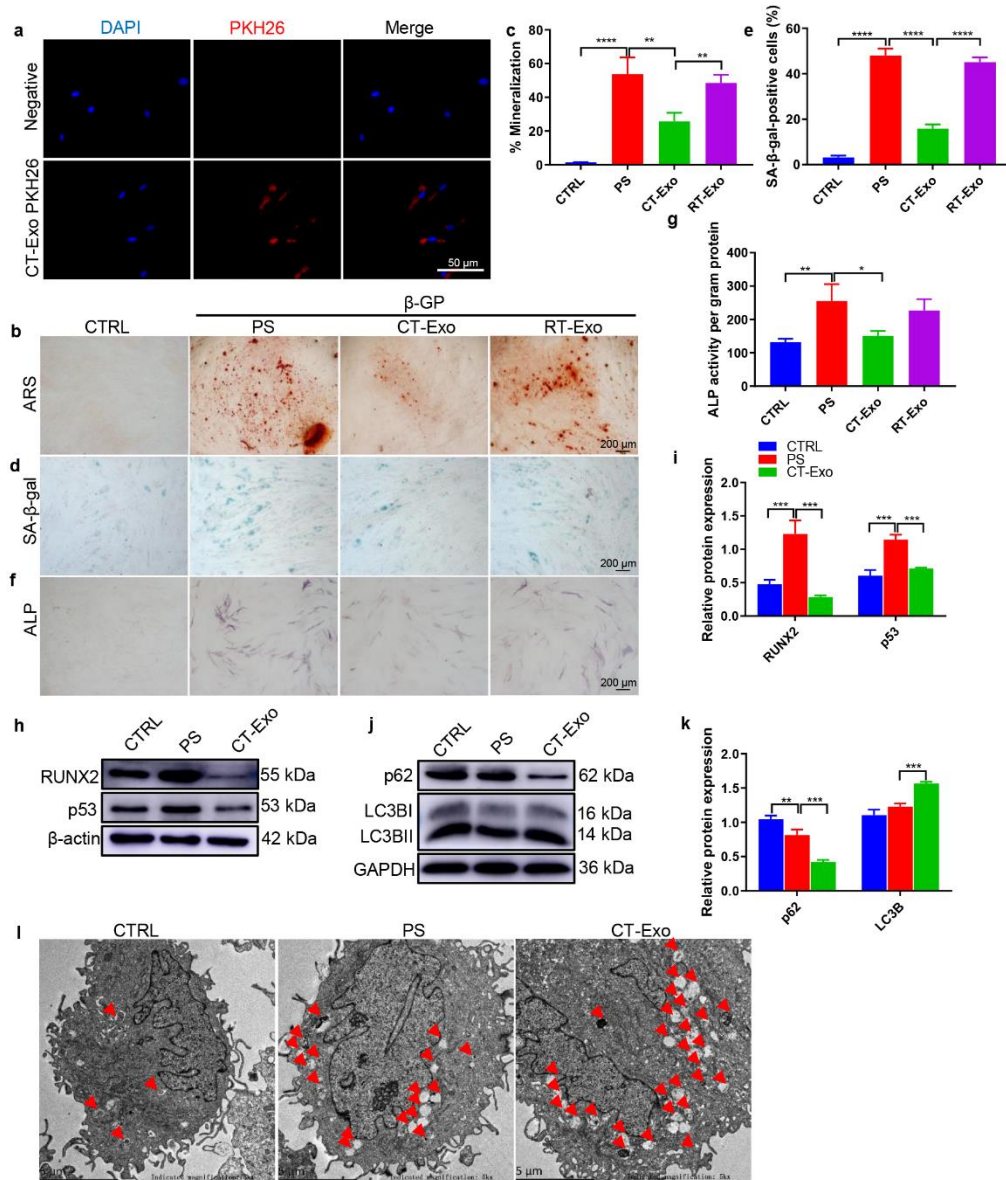

1253  
 1254 **Fig. 3 CT-Exo protected VSMCs against calcification by promoting autophagy.** (a)  
 1255 Representative fluorescence micrograph of PKH26-labelled CT-Exo (red) internalised  
 1256 by VSMCs; nuclei are shown in blue. The white scale bar is 50  $\mu\text{m}$ . ARS (b) and SA- $\beta$ -gal  
 1257 (d) staining was evaluated in VSMCs incubated with  $\beta$ -GP and CT-Exo for 28 and  
 1258 10 days, respectively.  $n = 5$ , the black scale bar is 200  $\mu\text{m}$ . (c, e) The data are presented  
 1259 as ratio of positive staining area. (f) ALP staining was measured in VSMCs incubated  
 1260 with  $\beta$ -GP and CT-Exo for 14 days. The black scale bar is 200  $\mu\text{m}$ . (g) ALP activity. (h)  
 1261 RUNX2 and p53 protein expression was determined by western blotting after  $\beta$ -GP and

1262 CT-Exo treatment for 3 days. The data are presented as densitometric ratios normalised  
 1263 to  $\beta$ -actin (i),  $n = 4$ . (j, k) Western blots (j) and quantification (k) of p62 and LC3B in  
 1264 the PBS, PS and CT-Exo VSMCs,  $n = 4$ . (l) VSMCs were incubated with  $\beta$ -GP and CT-  
 1265 Exo for 72 h and then analysed by electron microscopy; a representative image is shown.  
 1266 Autophagosomes containing organelle remnants are highlighted by red arrows ( $n = 4$   
 1267 per group). The PS group represents the control group with only  $\beta$ -GP treatment. Each  
 1268 experiment was repeated three times. The data are presented as the mean  $\pm$  standard  
 1269 deviation with three replicates. The data were analysed with one-way ANOVA with the  
 1270 Bonferroni *post hoc* test. \* $p < 0.05$ ; \*\* $p < 0.01$ ; \*\*\* $p < 0.001$ ; \*\*\*\* $p < 0.0001$

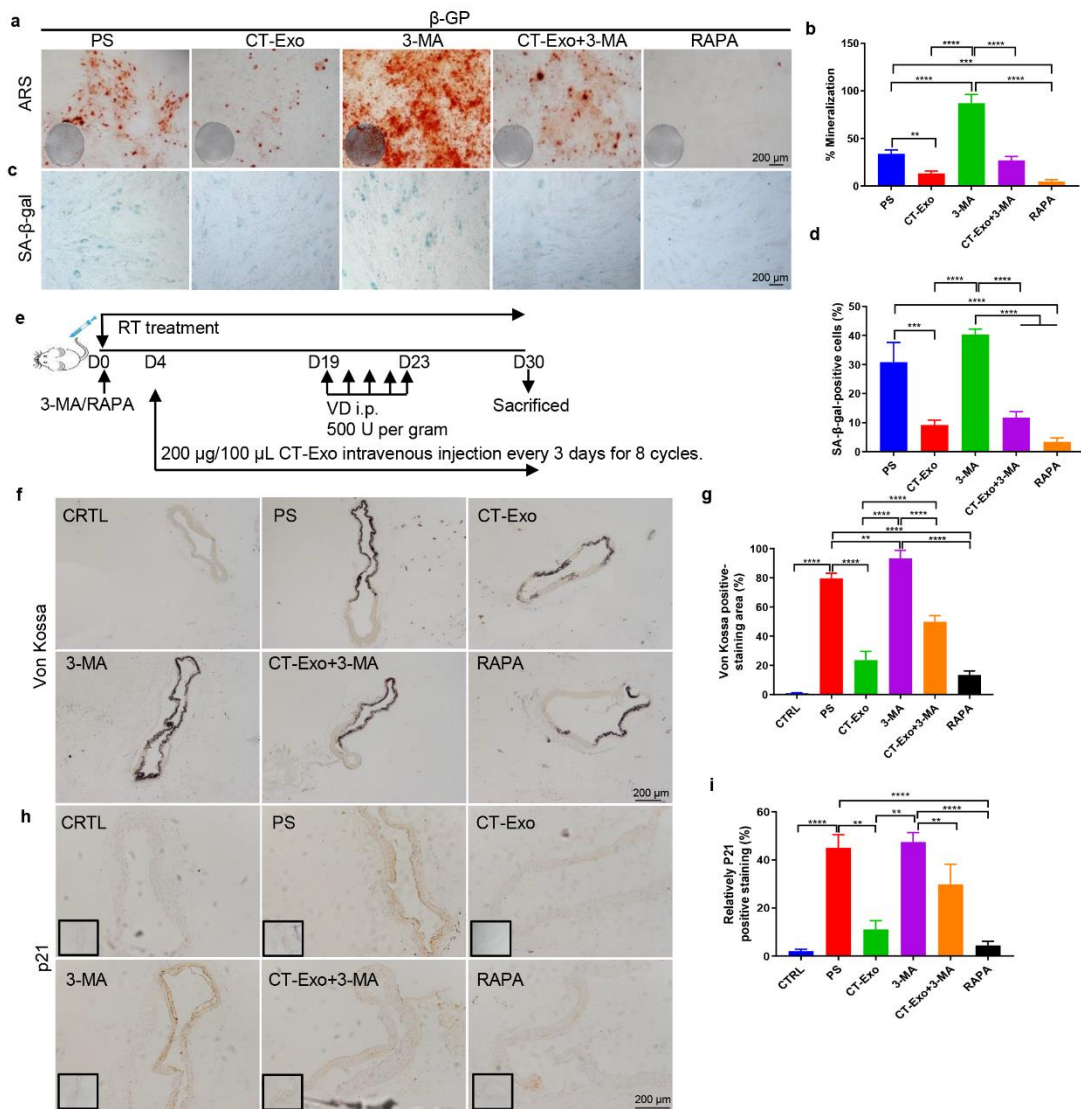

1271  
 1272 **Fig. 4 3-MA attenuated the pro-aging/pro-calcification preventive effect of CT-Exo**  
 1273 ***in vitro* and *in vivo*.** Representative images of ARS (a) and SA- $\beta$ -gal (c) staining of  
 1274 VSMCs that had been pre-treated with the indicated concentrations of 3-MA or RAPA  
 1275 for 30 min and then incubated with  $\beta$ -GP for 28 and 10 days, respectively.  $n = 5$ , the  
 1276 scale bar is 200  $\mu$ m. Quantitative analysis of the percentages of ARS+ (b, in red) and



1277 SA- $\beta$ -gal<sup>+</sup> (d, in green) areas. (e) Schematic illustration of the experimental design used  
 1278 to assess the effects of CT-Exo and 3-MA on the vascular phenotype in VD-induced  
 1279 mice (n = 6 per group). (f, g) Von Kossa staining showed calcified aorta from CTRL,  
 1280 PS, CT-Exo, 3-MA, CT-Exo+3-MA and RAPA mice (n = 6 per group). The black scale  
 1281 bar is 200  $\mu$ m. (h, i) p21 expression in aorta from the six groups of mice were examined  
 1282 by immunohistochemistry. The black scale bar is 200  $\mu$ m (n = 6 per group). The CTRL  
 1283 group represents the negative control group with only PBS treatment. The PS group  
 1284 represents the positive control group with only  $\beta$ -GP treatment. The data are presented  
 1285 as the mean  $\pm$  standard deviation. The data were analysed with one-way ANOVA with  
 1286 the Bonferroni *post hoc* test. \* $p < 0.05$ ; \*\* $p < 0.01$ ; \*\*\* $p < 0.001$ ; \*\*\*\* $p < 0.0001$

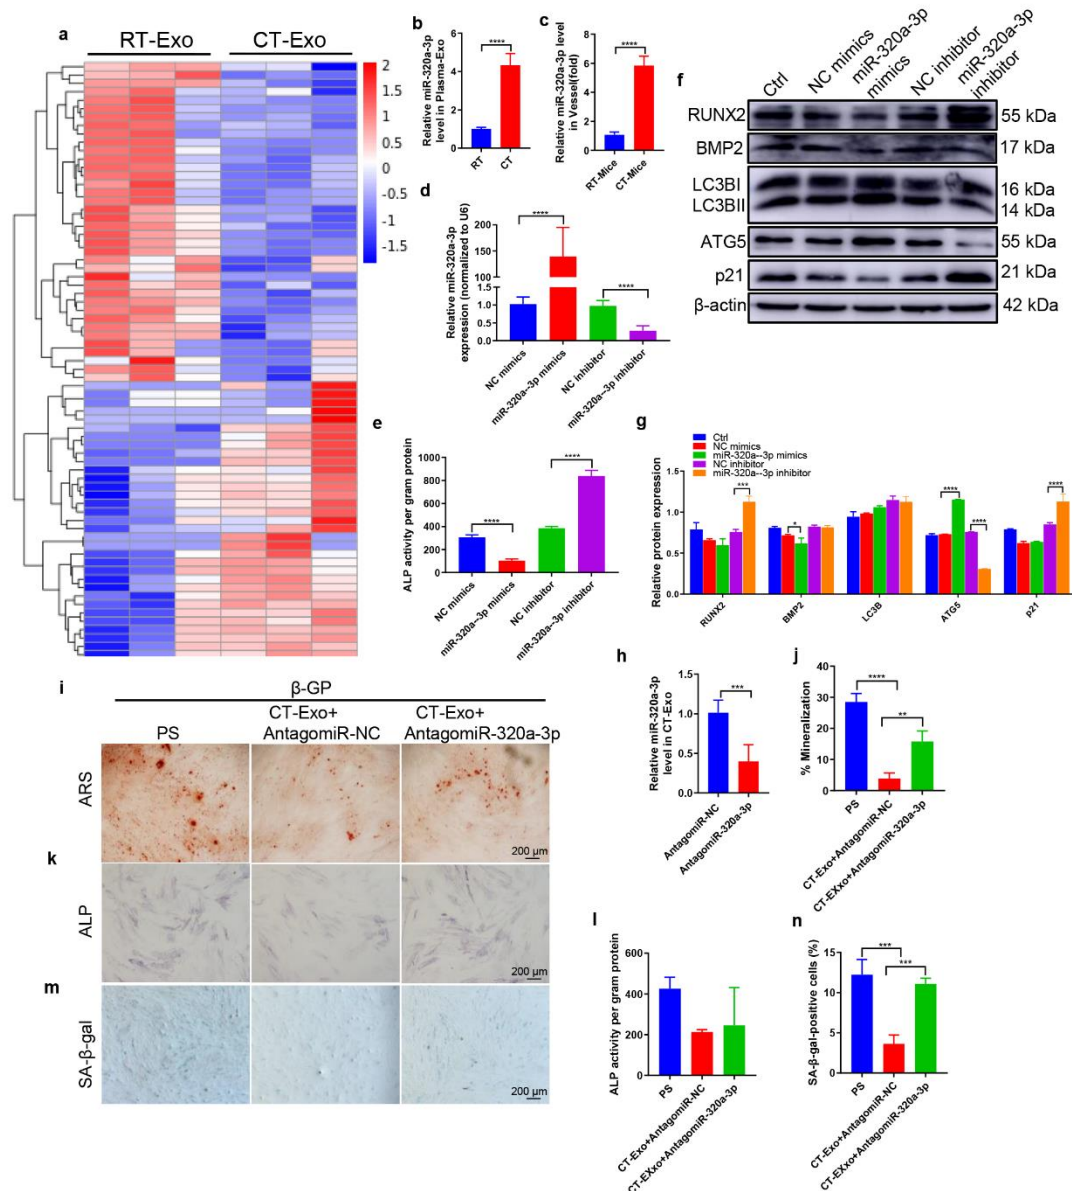

1287  
 1288 **Fig. 5 miR-320a-3p antagonised osteogenic differentiation of VSMCs.** (a) The  
 1289 heatmap shows the differentially expressed miRNAs (absolute fold change  $\geq 1.5$ ,  $p <$   
 1290 0.05) between CT-Exo and RT-Exo (n = 3 per group). (b) qRT-PCR analysis of miR-  
 1291 320a-3p expression in exosomes from the plasma of the RT or CT mice (n = 6). (c) qRT-

1292 PCR analysis of miR-320a-3p expression in vessel s from RT or CT mice (n = 6). (d)  
1293 qRT-PCR was performed to evaluate the expression of miR-320a-3p in VSMCs  
1294 transfected with specific miR-320a-3p mimics or inhibitor (n = 4). (e) The ALP activity  
1295 was evaluated by using specific kits in VSMCs transfected with specific miR-320a-3p  
1296 mimics or inhibitors (n = 4). (f) Western blotting was performed to determine the  
1297 protein expression of RUNX2, BMP2, LC3B, ATG5 and p21 in VSMCs transfected  
1298 with specific miR-320a-3p mimics or inhibitors (n = 4). (g) The data are presented as  
1299 densitometric ratios normalised to  $\beta$ -actin. (h) qRT-PCR analysis of miR-320a-3p  
1300 expression in CT-Exo+AntagomiR-320a-3p (n = 6). ARS staining (i, j), ALP staining  
1301 (k) and ALP activity (l) quantification of SA- $\beta$ -gal-stained positive cells was shown (m,  
1302 n). The black scale bar represents 200  $\mu$ m (n = 5 per group). The PS group represents  
1303 the positive control group with only  $\beta$ -GP treatment. The data are presented as the mean  
1304  $\pm$  standard deviation. The data were analysed with one-way ANOVA with the  
1305 Bonferroni *post hoc* test or the unpaired, two-tailed Student's t-test. \* $p < 0.05$ ; \*\* $p <$   
1306  $0.01$ ; \*\*\* $p < 0.001$ ; \*\*\*\* $p < 0.0001$ .

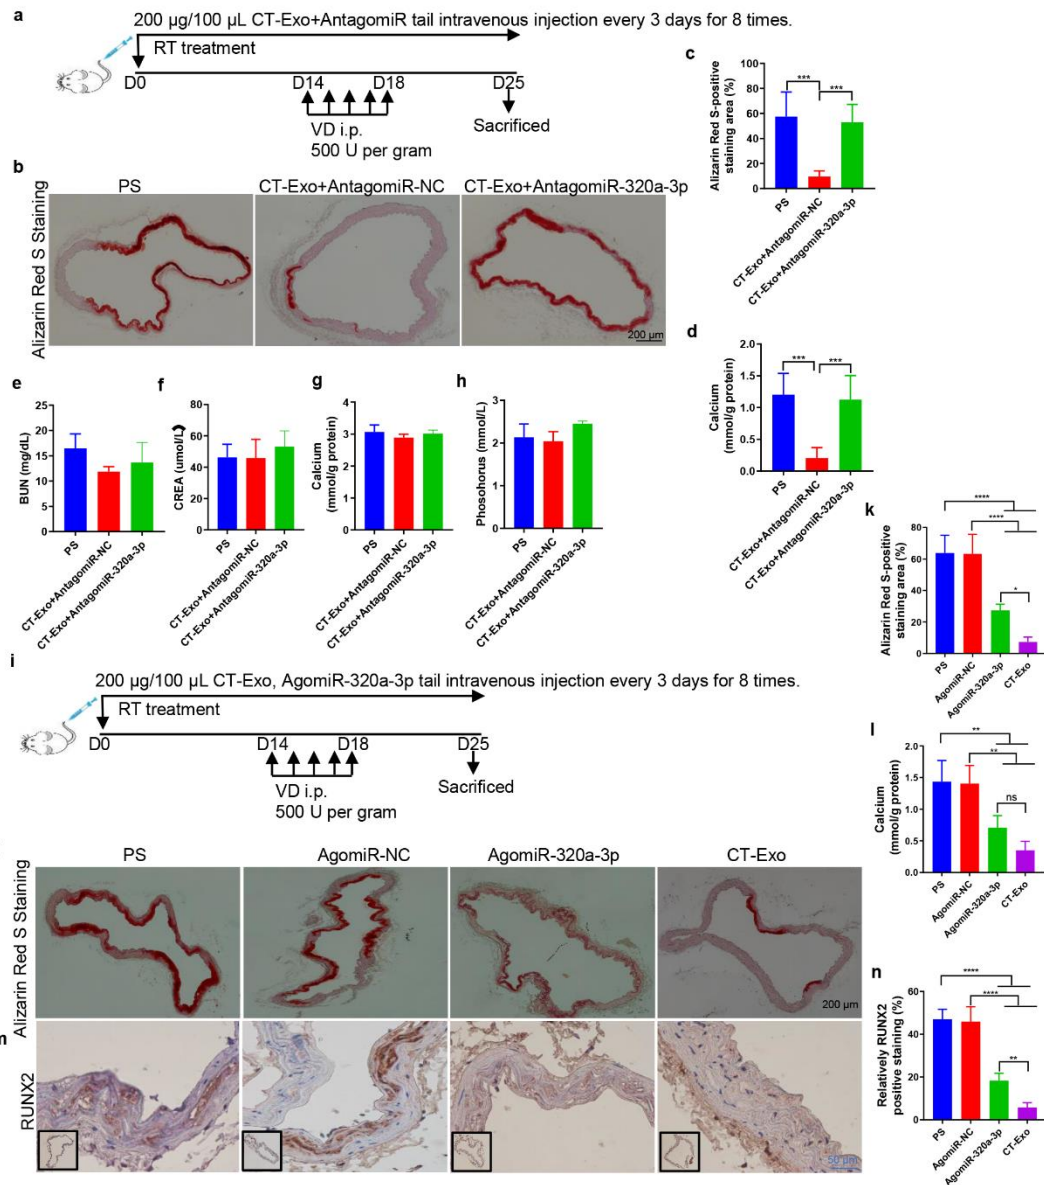

1307

1308

1309

1310

1311

1312

1313

1314

1315

1316

1317

1318

1319

1320

1321

**Fig. 6 miR-320a-3p effectively protected against MAC *in vivo* and its related biochemical indicators.** (a) Experimental design of the VD-induced vascular calcification mouse model treated with PBS, CT-Exo+AntagomiR-NC or CT-Exo+AntagomiR-320a-3p by intravenous injection ( $n = 6$  per group). ARS staining and quantitation (b, c) and vascular calcium content measurement (d). The black scale bar is  $200 \mu\text{m}$ . Serum BUN (e), CREA (f), calcium (g) and phosphate (h) levels in mice with VD-induced vascular calcification ( $n = 6$ ). (i) Experimental design of the VD-induced vascular calcification mouse model treated with PBS, AgomiR-NC or AgomiR-320a-3p by intravenous injection ( $n = 6$ ). ARS staining and quantitation (j, k) and vascular calcium content measurement (l). RUNX2 expression in the thoracic aorta (m) and quantitation of positive staining area (n) are shown. The black scale bar is  $200 \mu\text{m}$  and the blue scale bar is  $50 \mu\text{m}$ . The PS group represents the control group with only  $\beta$ -GP treatment. The data are presented as the mean  $\pm$  standard deviation. The data were analysed with one-way ANOVA with the Bonferroni *post hoc* test. ns  $> 0.05$ ; \* $p$



1337 presence or absence of PDCD4 siRNA for 28 days; representative micrographs are  
 1338 shown. (K) SA- $\beta$ -gal staining was measured in VSMCs incubated with  $\beta$ -GP for 10  
 1339 days.  $n = 4$ , the data are presented as the ratio of positive ARS (j) and SA- $\beta$ -gal (m)  
 1340 staining area. The scale bar is 200  $\mu$ m. The data are presented as the mean  $\pm$  standard  
 1341 deviation. The data were analysed with one or two-way ANOVA with the Bonferroni  
 1342 *post hoc* test. ns > 0.05; \* $p$  < 0.05; \*\* $p$  < 0.01; \*\*\* $p$  < 0.001 and \*\*\*\* $p$  < 0.0001.

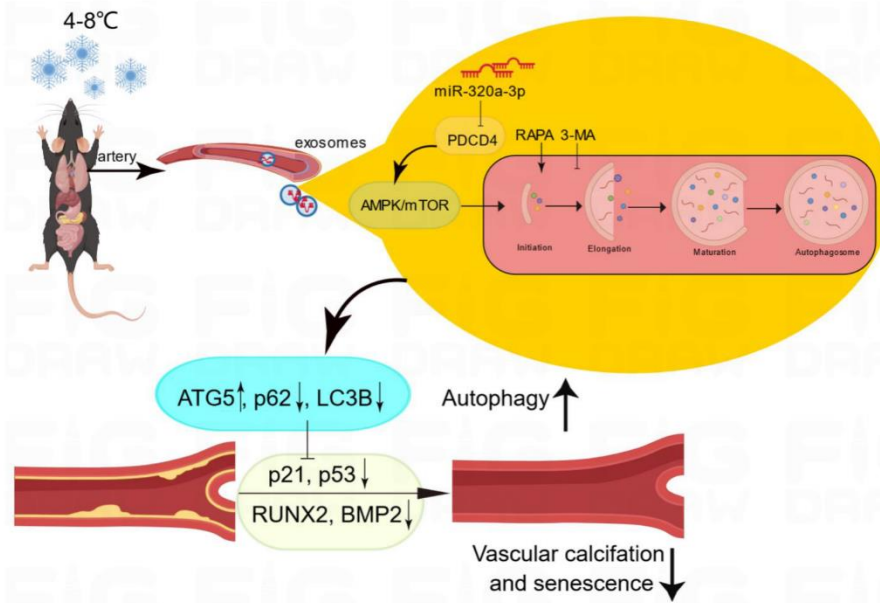

1343  
 1344 **Fig. 8 CT-Exo enrichment of miR-320a-3p under CT exposure can protect against**  
 1345 **vascular calcification and senescence by activating autophagy through the**  
 1346 **AMPK/mTOR pathway.** CT-Exo with the high expression of miR-320a-3p can be  
 1347 secreted from mice plasma exposed to a cold environment. PDCD4 was found to be a  
 1348 potential target of miR-320a-3p and to increase osteogenic differentiation and  
 1349 senescence of VSMCs. CT-Exo can activate AMPK/mTOR, a classical autophagy  
 1350 pathway and then activate the expression of autophagy proteins (LC3B and ATG5) and  
 1351 reduce the degradation of autophagy specific substrates (p62). Ultimately, this slow

1352 down the level of senescence (p21 and p53) and decrease the level of calcification  
1353 (RUNX2 and BMP2) of VSMCs.
